# Supplementary material for: Inorganic ligand-protected synthesis and characterization of a {Ag6} cluster within an annular polyoxometalate
Source: Royal Society of Chemistry journal article supplement (doi:10.1039/d4ta05238b), 2024-01-01
Supplement: d4ta05238b1.pdf [file d4ta05238b1.pdf]

## Supporting Information

### Inorganic Ligand-Protected Synthesis and Characterization of {Ag<sub>6</sub>} Cluster within Annular Polyoxometalate

Yahao Sun, Shihao Zhang, Minzhen Cai, Pengtao Ma, Jingyang Niu\* and Jingping Wang\*

Henan Key Laboratory of Polyoxometalate Chemistry, College of Chemistry and Molecular Sciences, Henan University, Kaifeng Henan 475004 (P.R. China)

E-mail: jyniu@henu.edu.cn; jpwang@henu.edu.cn.

#### Table of Contents

##### Supplementary Experimental Section

**Figure S1.** (a) The Ball-and-stick and (b) polyhedral representation of hollow ring for protected ligand {P<sub>6</sub>W<sub>37</sub>} of **1**.

**Figure S2.** The details of disorder silver positions of compound **1**.

**Figure S3.** The polyhedral representation of compound **1** in two kinds of view with three sizes.

**Figure S4.** The plot of proton transport in compound **1**.

**Figure S5.** (a) The thermogravimetric curves of **1** and (b) the IR spectra of P<sub>2</sub>W<sub>12</sub> and compound **1**.

**Figure S6.** (a) PL and (b) TRPL plots of **1** and P<sub>2</sub>W<sub>12</sub>.

**Figure S7.** (a) The XPS survey spectra of compound **1**; (b) The XPS spectra of P 2p for compound **1**; (c) The Auger electron spectrum before and after catalysis; (d) XPS spectra of Ag 3d after catalysis.

**Figure S8.** The fitting equivalent circuit for measuring proton conductivity.

**Figure S9.** (a) Arrhenius plot of proton conductivities at 98% RH for **1**; (b) Water adsorption isotherm of **1**; (c) FTIR spectra of before and after test for **1**; (d) The PXRD of compound **1** with simulated and after water adsorption as well as after test.

**Table S1.** Crystallographic data parameters for **1**.

**Table S2.** The bond lengths of disorder position Ag–O and Ag–Ag.

**Table S3.** The bond lengths of ordered position W–O, Ag–O and P–O.

**Table S4.** The angle value of ordered position O–W–O.

**Table S5.** Bond valence sum calculations of P, W and O atoms of compound **1**.

**Table S6.** Comparison of various proton conducting materials.

**Table S7.** Optimization of **1** for reduction of nitrobenzene to aniline.

**Table S8.** Summary of the yield of the reduction of nitrobenzene with different catalysts.

**Table S9.** The table of catalytic reduction of N-phenylhydroxylamine and azobenzene by **1**.

**Figure S10.** <sup>1</sup>H NMR spectra of Aniline (500 MHz, CDCl<sub>3</sub>).

**Figure S11.**  $^{13}\text{C}$  NMR spectra of Aniline (126 MHz,  $\text{CDCl}_3$ ).

**Figure S12.**  $^1\text{H}$  NMR spectra of 2-Fluoroaniline (500 MHz,  $\text{CDCl}_3$ ).

**Figure S13.**  $^{13}\text{C}$  NMR spectra of 2-Fluoroaniline (126 MHz,  $\text{CDCl}_3$ ).

**Figure S14.**  $^1\text{H}$  NMR spectra of 3-Fluoroaniline (500 MHz,  $\text{CDCl}_3$ ).

**Figure S15.**  $^{13}\text{C}$  NMR spectra of 3-Fluoroaniline (126 MHz,  $\text{CDCl}_3$ ).

**Figure S16.**  $^1\text{H}$  NMR spectra of 4-Fluoroaniline (500 MHz,  $\text{CDCl}_3$ ).

**Figure S17.**  $^{13}\text{C}$  NMR spectra of 4-Fluoroaniline (126 MHz,  $\text{CDCl}_3$ ).

**Figure S18.**  $^1\text{H}$  NMR spectra of o-Toluidine (500 MHz,  $\text{CDCl}_3$ ).

**Figure S19.**  $^{13}\text{C}$  NMR spectra of o-Toluidine (126 MHz,  $\text{CDCl}_3$ ).

**Figure S20.**  $^1\text{H}$  NMR spectra of m-Toluidine (500 MHz,  $\text{CDCl}_3$ ).

**Figure S21.**  $^{13}\text{C}$  NMR spectra of m-Toluidine (126 MHz,  $\text{CDCl}_3$ ).

**Figure S22.**  $^1\text{H}$  NMR spectra of p-Toluidine (500 MHz,  $\text{CDCl}_3$ ).

**Figure S23.**  $^{13}\text{C}$  NMR spectra of p-Toluidine (126 MHz,  $\text{CDCl}_3$ ).

**Figure S24.**  $^1\text{H}$  NMR spectra of 3-Chloroaniline (500 MHz,  $\text{CDCl}_3$ ).

**Figure S25.**  $^{13}\text{C}$  NMR spectra of 3-Chloroaniline (126 MHz,  $\text{CDCl}_3$ ).

**Figure S26.**  $^1\text{H}$  NMR spectra of 2-Chloroaniline (500 MHz,  $\text{CDCl}_3$ ).

**Figure S27.**  $^{13}\text{C}$  NMR spectra of 2-Chloroaniline (126 MHz,  $\text{CDCl}_3$ ).

**Figure S28.**  $^1\text{H}$  NMR spectra of 4-Ethylaniline (500 MHz,  $\text{CDCl}_3$ ).

**Figure S29.**  $^{13}\text{C}$  NMR spectra of 4-Ethylaniline (126 MHz,  $\text{CDCl}_3$ ).

**Figure S30.** The GC-MS spectrum of aniline (bottom, simulation; top, experiment)

## Materials and Physical Measurements

All chemicals used in the reaction were purchased from commercial sources and were not further purified. The FT-IR spectra were collected on a Bruker VERTEX 70 IR spectrometer using KBr pellets in the region of 400–4000  $\text{cm}^{-1}$ . Thermogravimetric analyses (TGA) were conducted using a NETZSCH STA 449 F5 Jupiter thermal analyzer in an  $\text{N}_2$  atmosphere and the analysis was carried out over a temperature range of 25  $^\circ\text{C}$  to 800  $^\circ\text{C}$  with a heating rate of 10  $^\circ\text{C}\cdot\text{min}^{-1}$ . Solid-state UV-vis absorption spectra and diffuse reflectance spectra were collected at room temperature using a HITACHI U-4500 UV-Vis-NIR spectrometer equipped with a 60 mm diameter integrating sphere on a finely ground sample. Elemental analysis for Na, K, P, W, and Ag atoms was conducted by Inductively coupled plasma atomic emission spectrometer (ICP-OES) analyses and was recorded on a PerkinElmer Optima 2100 DV spectrometer (PerkinElmer, Waltham, MA). X-ray powder diffraction (PXRD) data were collected at room temperature using an X-ray powder diffractometer (Bruker, D8 Advance) with  $\text{Cu K}\alpha$  radiation ( $\lambda = 1.5418 \text{ \AA}$ ) in the  $2\theta$  angular range of 5–50 $^\circ$ . The X-ray photoelectron spectroscopy (XPS) technique was measured on a Thermo Scientific K-Alpha spectrometer with monochromatic  $\text{Al K}$  ( $h\nu = 1486.6 \text{ eV}$ ) as the excitation source at a working pressure of 12 kV. Cyclic voltammetry tests and the Mott-Schottky experiment were carried out on a CHI760E electrochemistry workstation (CH Instruments, Inc.) in a standard three-electrode system. The  $\text{Ag}/\text{AgCl}$  electrode and platinum foil were used as the reference electrode and counter electrode, respectively. Single-crystal X-ray diffraction data was collected at 150 K using graphite-monochromate  $\text{Mo K}\alpha$  radiation ( $\lambda = 0.71073 \text{ \AA}$ ) on a Bruker D8 VENTURE PHOTON II. Alternating current (AC) impedance measurements were performed on a Pentium/IM6 impedance analyzer with frequencies ranging from 0.1 Hz to 5 MHz using an applied voltage of 50 mV. The relative humidity (RH) was controlled by a STIK Corp. CIHI-150B incubator. Water adsorption isotherm of compound **1** was tested on the Specific surface and porosity analyzer. The steady state photoluminescence spectra and time-resolved decay photoluminescence spectra were recorded on photoluminescence spectrometer (Edinburg FLS1000). The  $^1\text{H}$  and  $^{13}\text{C}$  spectra were obtained on a Bruker AVANCE NEO 500 MHz NMR spectrometer. The photocatalytic products were confirmed by GC-MS (Agilent 7890B GC/5973B MS, SE-54 capillary column), and GC calculations of conversion and selectivity were performed on Bruker 450-GC.

## X-ray Crystallography

The crystal of compound **1** was mounted on a loop and maintained at 150 K during data collection using a Bruker D8 VENTURE PHOTON II CCD diffractometer with  $\text{Mo K}\alpha$  radiation ( $\lambda = 0.71073 \text{ \AA}$ ). The structure was analyzed using Olex2 and solved with the ShelXT structure solution program. The direct methods were used to refine the text, which was then further refined using the ShelXL-2018/3 refinement package through least squares minimization.<sup>1,2</sup> In the final refinement, all the nonhydrogen atoms including W, Ag, P, K, and Na atoms were refined anisotropically.<sup>3</sup> Few lattice water molecules were located by Fourier difference maps; the rest lattice waters were positioned by TG analysis (Figure S4). In addition, several protons were added to the structural formula to keep **1** electric neutrality, which is quite common in POM chemistry.<sup>4</sup> The crystallographic data of **1** has been deposited in the Cambridge Crystallographic Data Center with the CCDC number: 2349949. Detailed crystallographic data and structure refinement parameters are summarized in the following Table S1.

**Synthesis of** :  $\text{Na}_6\text{K}_6\text{H}_{25}[(\text{P}_6\text{W}_{37}\text{O}_{127})\{\text{Ag}_2(\text{Ag}_6\text{O}_{19})\}]\cdot 53\text{H}_2\text{O}$  (**1**).

The solution of 0.5 M NaAC-HAc (pH=6) with  $\text{CH}_3\text{COONa}\cdot 3\text{H}_2\text{O}$  (34.02 g, 0.25 mol) dissolved in 500 mL

distilled water was slowly stirred until dissolved at ambient temperature. Subsequently, the pH of the solution was adjusted to 1.9 by adding nitric acid dropwise. And then taking out 10 mL reaction solution divided separately into reactors,  $K_{12}[\alpha\text{-H}_2\text{P}_2\text{W}_{12}\text{O}_{48}]\cdot 24\text{H}_2\text{O}$  (0.3 g, 0.063 mmol) was added under stirring conditions (pH=3.0). Once  $\text{P}_2\text{W}_{12}$  is dissolved,  $\text{AgNO}_3$  (0.038 g, 0.22 mmol) is added, and a white suspension is obtained after stirring (pH=2.9). After stirring for a further 2 h, the resulting solution was sealed in a Teflon-lined stainless autoclave and heated at 80 °C for 96 h under autogenous pressure. After gently cooling to room temperature, the solution was filtrated into clean beakers and allowed to stand still for slow evaporation at room temperature. The colorless rod-like crystals **1** were obtained after two days with a yield of about 1.40 % based on  $\text{AgNO}_3$ . Anal. Calcd. (%) for **1**: Na, 1.12; K, 1.90, P, 1.51; W, 55.24; Ag, 7.01. Found: Na, 1.40; K, 1.36, P, 1.71; W, 56.39; Ag, 6.77. IR (KBr disks): 3471(m), 1618(m), 1381 (w), 1156 (s), 1086 (m), 920 (s), 825 (s), 712 (s).

#### Photoelectrochemistry property test of $\{\text{Ag}_6\}$ semiconductor.

In the electrochemical workstation (CHI-760E, Shanghai, China), a three-electrode system was selected to measure the Mott–Schottky plot. In the three-electrode system, the glassy carbon electrode was employed as the working electrode, the Pt plate as the counter electrode, and the Ag/AgCl electrode as the reference electrode. The 0.2 M  $\text{Na}_2\text{SO}_4$  solution was utilized as the electrolyte, and high-purity  $\text{N}_2$  was introduced into the solution for a minimum of 30 minutes to remove oxygen prior to testing. The sample of 5 mg was dispersed into a mixture of 470  $\mu\text{L}$  ethanol and 30  $\mu\text{L}$  Nafion by sonication for 1 h. The suspension (20  $\mu\text{L}$ ) was applied to the surface of the working electrode and allowed to air dry naturally at room temperature.

#### The calculation of parameters for the assessment of catalyst performance.

$$TON = \frac{n_p}{n_c} \quad TOF = \frac{n_p}{n_c \cdot t}$$

The calculation of Turnover number (TON) and Turnover frequency (TOF):

where  $n_p$  is the molar amount of the product (mol);  $n_c$  is the molar amount of the catalyst (mol);  $t$  is the reaction time (h).

The calculation of apparent quantum yield (AQY): The AQY is determined using a similar method to that for the photocatalytic performance test. Catalyst **1** (0.5  $\mu\text{mol}$ ), nitrobenzene (0.5 mmol),  $\text{N}_2\text{H}_4\cdot\text{H}_2\text{O}$  (3 mmol), methanol (1 mL),  $\text{N}_2$  (1 atm), and 10 W 365 nm LED lamp. The intensity of the incident light was  $14.93 \text{ mW}\cdot\text{cm}^{-2}$ , which was tested by a photometer (CEL-NP2000-2A, Beijing CEAlight Co., Ltd., China), and the irradiated area is  $2 \text{ cm}^2$ . The yield of aniline was 19.95% after 12 min.

$$AQY\% = \frac{\text{amounts of products formed}}{\text{amounts of photons irradiated}} \times 100\%$$

$$= \frac{N_e}{N_p} = \frac{nN_A/t}{IS/h\nu} = \frac{nN_A hc}{IS\lambda t} \times 100\%$$

$N_e$  represents the amounts of products formed;

$N_p$  represents the amounts of photons irradiated;

$n$  is the molar amount of product formed (mol);

$t$  is the reaction time (s);

$N_A$  is Avogadro constant ( $6.022 \times 10^{23} \text{ mol}^{-1}$ );

$I$  is the incident light intensity at a certain wavelength ( $\text{W}\cdot\text{m}^{-2}$ );

$S$  is the irradiated area ( $\text{m}^2$ );

$h$  is Planck constant ( $6.626\times 10^{-34}$  J·s);

$c$  is the speed of light ( $2.998\times 10^8$  m·s<sup>-1</sup>);

$\lambda$  is the wavelength of incident light (m).

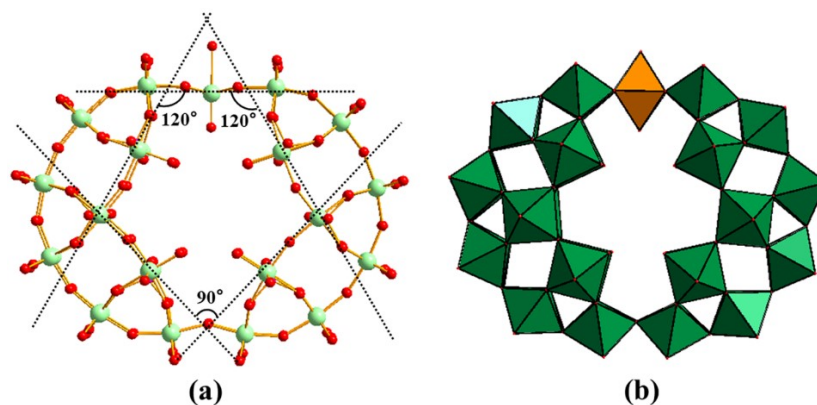

**Figure S1.** (a) The Ball-and-stick and (b) polyhedral representation of hollow ring for protected ligand  $\{P_6W_{37}\}$  of **1**. Color code: W (cyan), O (red), P (sky blue),  $WO_6$  octahedron (green, orange).

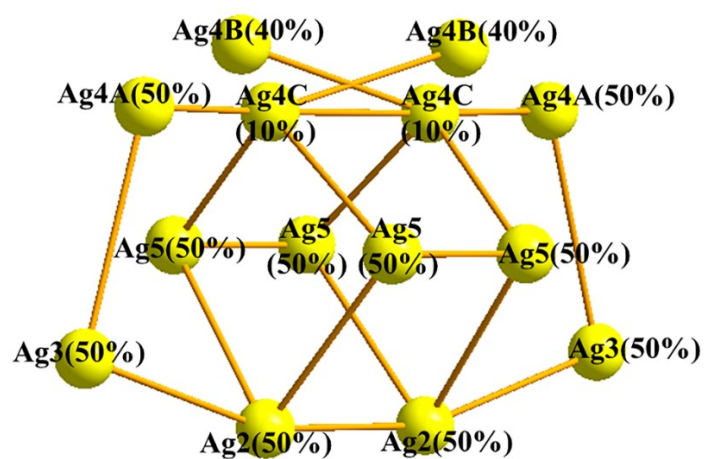

**Figure S2.** The details of disorder silver positions of compound **1**.

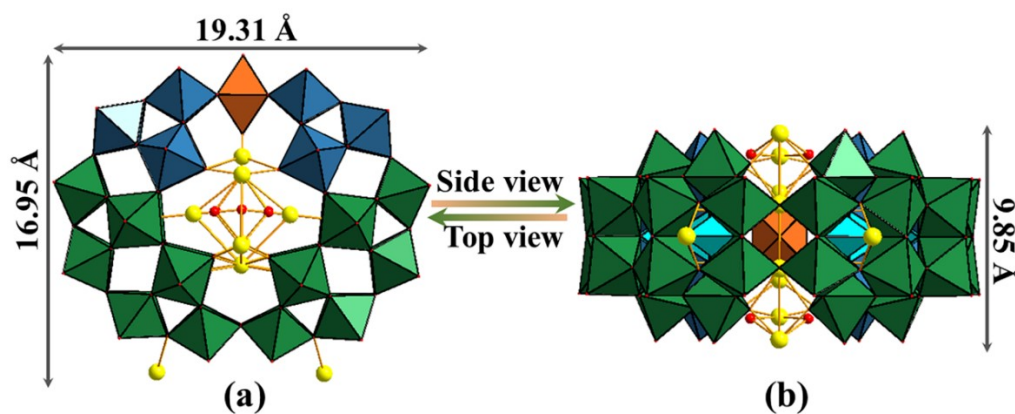

**Figure S3.** The polyhedral representation of compound **1** from (a) front view and (b) bottom view. Color code: Ag (yellow), O (red),  $PO_4$  (sky blue),  $WO_6$  octahedra (green, navy blue, and orange).

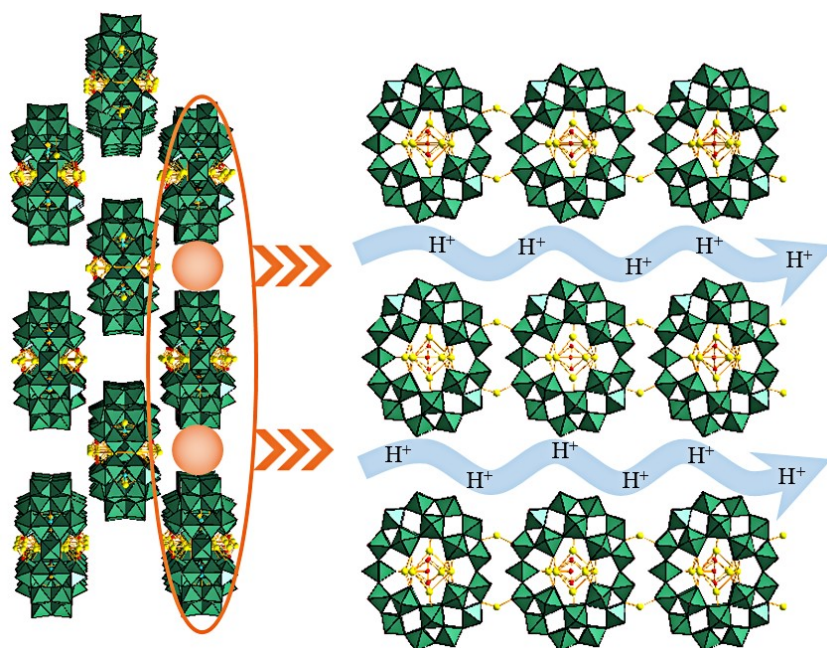

Figure S4. The plot of proton transport in compound **1**.

**TG analysis:** The TG measurement of compound **1** was made in an  $N_2$  atmosphere flowing in the temperature range from 25 to 800  $^{\circ}C$  with a heating rate of 10  $^{\circ}C \cdot min^{-1}$ . As shown in Figure S5 (a), the result of TG analysis illustrates that compound **1** undergoes one-step weight loss. The total weight loss (8.31%) from the temperature 25 to 200  $^{\circ}C$  can be attributed to the loss of fifty-three lattice water molecules (calcd 8.26%).

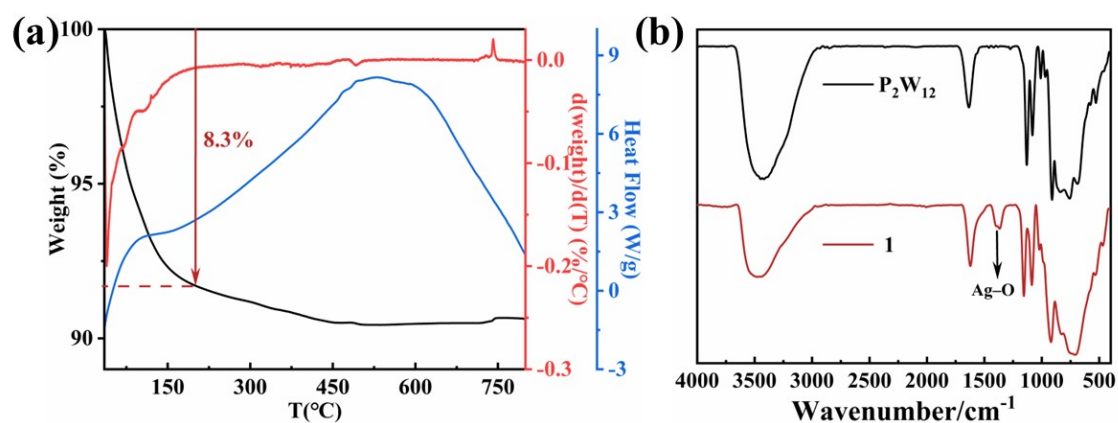

Figure S5. (a) The thermogravimetric curves of **1** and (b) the IR spectra of  $P_2W_{12}$  and compound **1**.

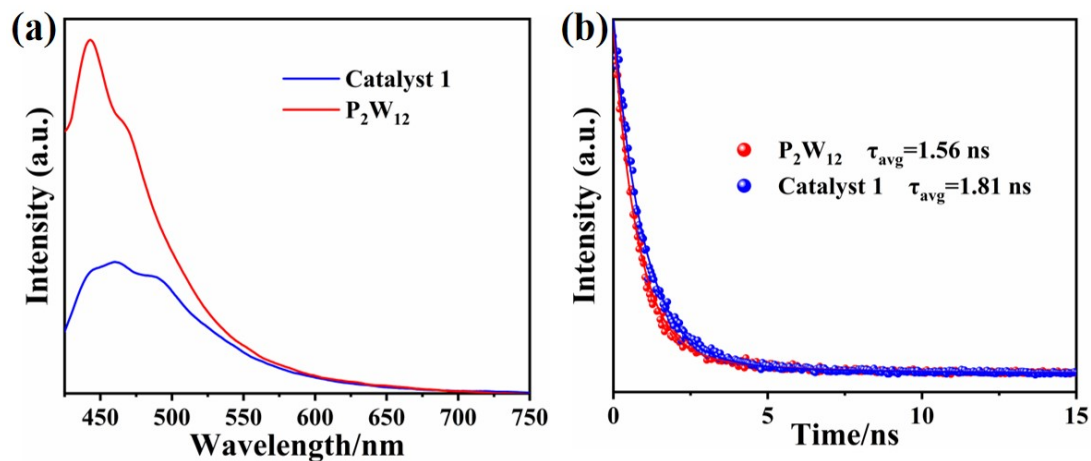

Figure S6. (a) PL and (b) TRPL plots of **1** and  $P_2W_{12}$ .

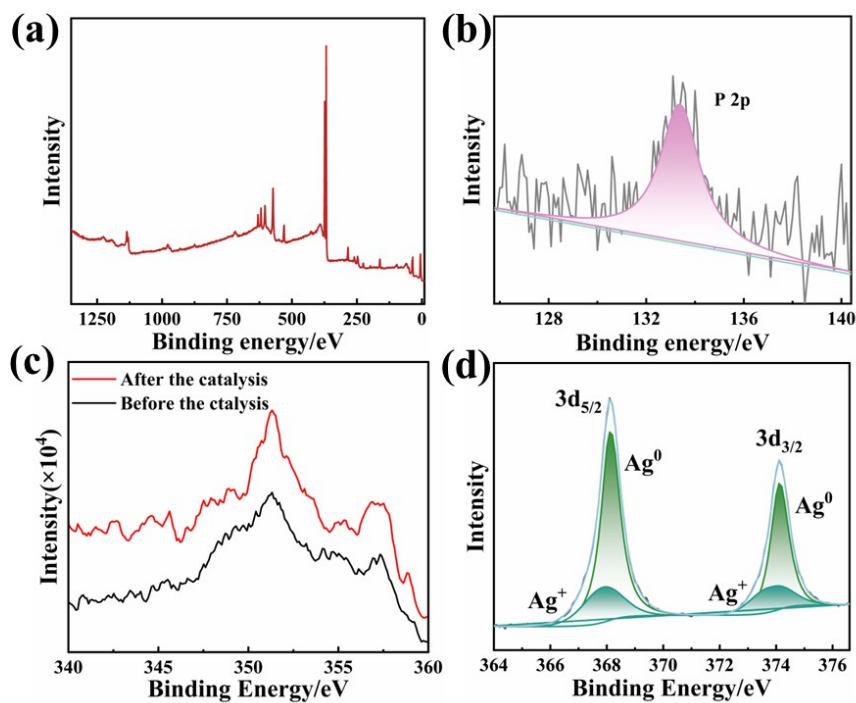

Figure S7. (a) The XPS survey spectra of compound **1**. (b) The XPS spectra of P 2p for **1**. (c) The Auger electron spectrum before and after catalysis. (d) XPS spectra of Ag 3d after catalysis.



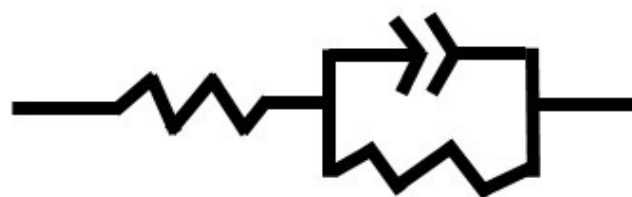

**Rs (CPE-Rp)**

Figure S8. The fitting equivalent circuit for measuring proton conductivity.

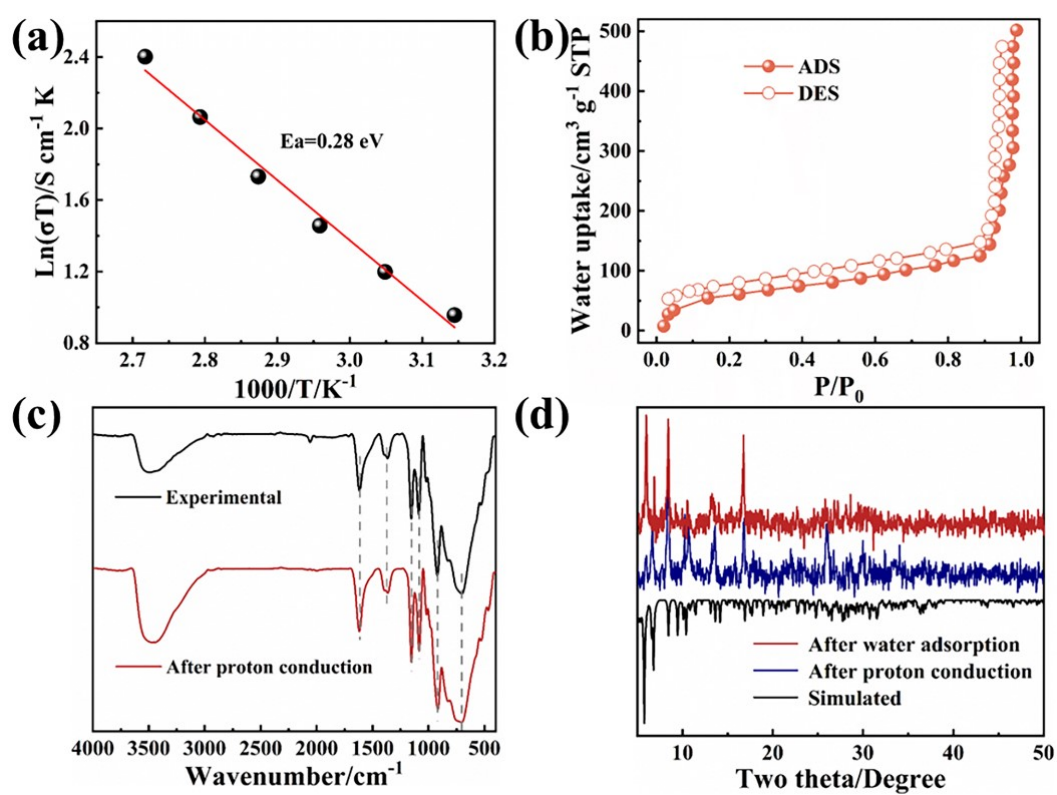

Figure S9. (a) Arrhenius plot of proton conductivities at 98% RH for **1**; (b) Water adsorption isotherm of **1**; (c) FTIR spectra of before and after test for **1**; (d) The PXRD of compound **1** with simulated and after water adsorption as well as after test.

Table S1. Crystallographic data parameters for 1.

| <b>1</b>                                     |                                                                                                |
|----------------------------------------------|------------------------------------------------------------------------------------------------|
| Empirical formula                            | Ag <sub>8</sub> K <sub>6</sub> Na <sub>6</sub> O <sub>160</sub> P <sub>6</sub> W <sub>37</sub> |
| Formula weight                               | 10783.77                                                                                       |
| Temperature (K)                              | 150.0                                                                                          |
| Crystal system                               | orthorhombic                                                                                   |
| Space group                                  | <i>Pmmn</i>                                                                                    |
| a /Å                                         | 20.9926(6)                                                                                     |
| b /Å                                         | 26.1232(6)                                                                                     |
| c /Å                                         | 17.5527(4)                                                                                     |
| α /deg                                       | 90                                                                                             |
| β /deg                                       | 90                                                                                             |
| γ /deg                                       | 90                                                                                             |
| V /Å <sup>3</sup>                            | 9625.8(4)                                                                                      |
| Z                                            | 2                                                                                              |
| ρ <sub>calc</sub> /g cm <sup>-3</sup>        | 3.721                                                                                          |
| μ /mm <sup>-1</sup>                          | 23.082                                                                                         |
| 2θ range/deg                                 | 3.88 to 50.198                                                                                 |
|                                              | -24 ≤ h ≤ 25                                                                                   |
| Index ranges                                 | -31 ≤ k ≤ 31                                                                                   |
|                                              | -19 ≤ l ≤ 20                                                                                   |
| Reflections collected                        | 56317                                                                                          |
| Independent reflections                      | 9000                                                                                           |
| R <sub>int</sub>                             | 0.0416                                                                                         |
| Data/restraints/parameters                   | 9000/48/562                                                                                    |
| GOF on F <sup>2</sup>                        | 1.032                                                                                          |
| R <sub>1</sub> , wR <sub>2</sub> [I > 2σ(I)] | 0.0486, 0.1398                                                                                 |
| R <sub>1</sub> , wR <sub>2</sub> [all data]  | 0.0537, 0.1453                                                                                 |

$$R_1 = \frac{\sum ||F_o| - |F_c||}{\sum |F_o|}, wR_2 = \frac{\{\sum [w(F_o^2 - F_c^2)^2]\}^{1/2}}{\sum [w(F_o^2)]^{1/2}}$$

**Table S2.** The bond length of disorder position Ag–O and Ag–Ag.

| Bond                  | Bond length | Bond                   | Bond length |
|-----------------------|-------------|------------------------|-------------|
| Ag2–O27 <sup>2</sup>  | 2.44 (11)   | Ag3–O27 <sup>2</sup>   | 2.118 (11)  |
| Ag2–O27               | 2.44 (11)   | Ag3–O27                | 2.118 (11)  |
| Ag3–O1 <sup>2</sup>   | 2.404 (14)  | Ag4A–O1                | 2.371 (11)  |
| Ag3–O1                | 2.404 (14)  | Ag4A–O1 <sup>2</sup>   | 2.371 (11)  |
| Ag4A–O21              | 1.932 (11)  | Ag4B–O21               | 2.420 (12)  |
| Ag4A–O21 <sup>2</sup> | 1.932 (11)  | Ag4B–O21 <sup>2</sup>  | 2.420 (12)  |
| Ag4B–O39              | 2.402 (11)  | Ag4C–Ag5               | 3.222 (18)  |
| Ag4C–Ag5 <sup>2</sup> | 3.222 (18)  | Ag4C–Ag4C <sup>1</sup> | 3.08(5)     |
| Ag4C–O4W              | 1.77 (4)    | Ag5–O4W                | 2.518 (5)   |
| Ag5–O12               | 2.506 (10)  | Ag2–Ag2 <sup>1</sup>   | 3.067 (10)  |
| Ag5–Ag5 <sup>3</sup>  | 2.562 (7)   |                        |             |

**Table S3.** The bond length of ordered position W–O, Ag–O and the P–O.

| Bond                | Bond length | Bond    | Bond length |
|---------------------|-------------|---------|-------------|
| Ag1–O4 <sup>3</sup> | 2.538 (10)  | Ag1–O38 | 2.368 (16)  |
| Ag1–O4              | 2.538 (10)  | P1–O14  | 1.517 (9)   |
| P1–O6               | 1.547 (13)  | P2–O9   | 1.563 (14)  |
| P1–O5               | 1.556 (14)  | P2–O20  | 1.534 (16)  |
| P2–O12              | 1.52 (1)    | P3–O16  | 1.534 (11)  |
| P3–O35              | 1.571 (15)  | W1–O17  | 1.778 (10)  |
| P3–O26              | 1.558 (14)  | W1–O8   | 1.942 (10)  |
| W1–O14              | 2.194 (10)  | W1–O22  | 1.909 (10)  |
| W1–O10              | 2.037 (9)   | W2–O4   | 1.95 (1)    |
| W1–O31              | 1.741 (10)  | W2–O13  | 1.931 (9)   |
| W2–O6               | 2.272 (8)   | W2–O10  | 1.840 (9)   |
| W2–O17              | 1.735 (9)   | W3–O3   | 1.923 (4)   |

---

|                     |            |                     |            |
|---------------------|------------|---------------------|------------|
| W2-O2               | 1.938 (6)  | W3-O5               | 2.281 (9)  |
| W3-O4               | 1.943 (10) | W3-O8               | 1.874 (9)  |
| W3-O7               | 1.940 (6)  | W4-O30              | 1.731 (11) |
| W3-O18              | 1.722 (9)  | W4-O25              | 1.962 (11) |
| W4-O28              | 1.881 (10) | W4-O15              | 1.977 (9)  |
| W4-O22              | 1.886 (10) | W5-O11              | 1.930 (7)  |
| W4-O12              | 2.16 (1)   | W5-O15              | 1.863 (10) |
| W5-O13              | 1.897 (9)  | W5-O23              | 1.729 (10) |
| W5-O19              | 1.949 (10) | W6-O1W              | 2.38 (2)   |
| W5-O9               | 2.253 (9)  | W6-O24 <sup>1</sup> | 1.914 (12) |
| W6-O24              | 1.914 (12) | W6-O24 <sup>3</sup> | 1.914 (12) |
| W6-O24 <sup>2</sup> | 1.914 (12) | W7-O16              | 2.153 (11) |
| W6-O39              | 1.71 (2)   | W7-O28              | 1.92 (1)   |
| W7-O21              | 1.799 (11) | W7-O34              | 1.937 (12) |
| W7-O29              | 2.045 (12) | W8-O20              | 2.277 (10) |
| W7-O40              | 1.752 (12) | W8-O32              | 1.928 (10) |
| W8-O25              | 1.867 (12) | W8-O41              | 1.731 (13) |
| W8-O33              | 1.925 (8)  | W9-O26              | 2.281 (10) |
| W8-O19              | 1.917 (10) | W9-O32              | 1.886 (10) |
| W9-O29              | 1.824 (13) | W9-O37              | 1.930 (8)  |
| W9-O36              | 1.982 (11) | W10-O42             | 1.729 (13) |
| W9-O43              | 1.718 (13) | W10-O35             | 2.261 (10) |
| W10-O34             | 1.883 (13) | W10-O38             | 1.944 (8)  |
| W10-O36             | 1.881 (11) | W10-O24             | 1.942 (11) |

---

**Table S4.** The angle value of ordered position O–W–O.

| Mode       | Angle    | Mode       | Angle    |
|------------|----------|------------|----------|
| O8–W1–O10  | 81.5(4)  | O8–W1–O14  | 82.7(4)  |
| O10–W1–O14 | 81.4(3)  | O22–W1–O8  | 162.5(4) |
| O22–W1–O10 | 86.8(4)  | O22–W1–O14 | 82.7(4)  |
| O27–W1–O8  | 94.4(4)  | O27–W1–O10 | 166.1(4) |
| O27–W1–O14 | 85.0(4)  | O27–W1–O22 | 93.9(4)  |
| O31–W1–O8  | 96.2(5)  | O31–W1–O10 | 93.6(4)  |
| O31–W1–O14 | 175.0(4) | O31–W1–O22 | 97.5(5)  |
| O31–W1–O27 | 100.0(5) | O2–W2–O4   | 87.6(5)  |
| O2–W2–O6   | 72.1(4)  | O4–W2–O6   | 82.8(4)  |
| O10–W2–O2  | 157.6(4) | O10–W2–O4  | 87.7(4)  |
| O10–W2–O6  | 85.6(4)  | O10–W2–O13 | 91.4(4)  |
| O13–W2–O2  | 88.5(5)  | O13–W2–O4  | 167.5(4) |
| O13–W2–O6  | 84.6(4)  | O17–W2–O2  | 99.7(5)  |
| O17–W2–O4  | 95.5(4)  | O17–W2–O6  | 171.6(4) |
| O17–W2–O10 | 102.6(4) | O17–W2–O13 | 96.9(4)  |
| O3–W3–O4   | 164.7(5) | O3–W3–O5   | 82.1(5)  |
| O3–W3–O7   | 89.4(6)  | O4–W3–O5   | 82.7(4)  |
| O7–W3–O4   | 88.6(5)  | O7–W3–O5   | 73.3(4)  |
| O8–W3–O3   | 88.8(5)  | O8–W3–O4   | 87.4(4)  |
| O8–W3–O5   | 84.9(4)  | O8–W3–O7   | 158.1(4) |
| O18–W3–O3  | 97.4(5)  | O18–W3–O4  | 97.9(4)  |
| O18–W3–O5  | 172.4(4) | O18–W3–O7  | 99.1(5)  |
| O18–W3–O8  | 102.7(5) | O15–W4–O12 | 83.4(4)  |
| O22–W4–O12 | 83.5(4)  | O22–W4–O15 | 89.7(4)  |
| O22–W4–O25 | 165.8(4) | O25–W4–O12 | 83.2(4)  |

|                          |          |                                       |          |
|--------------------------|----------|---------------------------------------|----------|
| O25-W4-O15               | 84.0(4)  | O28-W4-O12                            | 83.9(4)  |
| O28-W4-O15               | 166.9(4) | O28-W4-O22                            | 92.3(4)  |
| O28-W4-O25               | 91.0(4)  | O30-W4-O12                            | 177.1(4) |
| O30-W4-O15               | 94.2(4)  | O30-W4-O22                            | 98.3(5)  |
| O30-W4-O25               | 94.8(5)  | O30-W4-O28                            | 98.3(5)  |
| O11-W5-O9                | 72.8(4)  | O11-W5-O19                            | 88.2(5)  |
| O13-W5-O9                | 84.8(5)  | O13-W5-O11                            | 89.9(5)  |
| O13-W5-O19               | 166.8(4) | O15-W5-O9                             | 86.4(4)  |
| O15-W5-O11               | 159.0(4) | O15-W5-O13                            | 90.4(4)  |
| O15-W5-O19               | 86.8(4)  | O19-W5-O9                             | 82.2(5)  |
| O23-W5-O9                | 171.8(4) | O23-W5-O11                            | 99.2(5)  |
| O23-W5-O13               | 97.4(4)  | O23-W5-O15                            | 101.5(4) |
| O23-W5-O19               | 95.8(5)  | O24-W6-O1W                            | 80.4(4)  |
| O24 <sup>1</sup> -W6-O1W | 80.4(4)  | O24 <sup>2</sup> -W6-O1W              | 80.4(4)  |
| O24 <sup>3</sup> -W6-O1W | 80.4(4)  | O24 <sup>1</sup> -W6-O24 <sup>3</sup> | 89.2(8)  |
| O24-W6-O24 <sup>3</sup>  | 87.6(8)  | O24 <sup>1</sup> -W6-O24 <sup>2</sup> | 87.6(8)  |
| O24-W6-O24 <sup>2</sup>  | 89.2(8)  | O24 <sup>2</sup> -W6-O24 <sup>3</sup> | 160.8(7) |
| O24-W6-O24 <sup>1</sup>  | 160.8(7) | O39-W6-O1W                            | 180.0    |
| O39-W6-O24 <sup>3</sup>  | 99.6(4)  | O39-W6-O24 <sup>1</sup>               | 99.6(4)  |
| O39-W6-O24 <sup>2</sup>  | 99.6(4)  | O39-W6-O24                            | 99.6(4)  |
| O21-W7-O16               | 86.1(4)  | O21-W7-O28                            | 93.0(5)  |
| O21-W7-O29               | 167.1(5) | O21-W7-O34                            | 93.6(5)  |
| O28-W7-O16               | 83.0(4)  | O28-W7-O29                            | 87.3(4)  |
| O28-W7-O34               | 164.1(5) | O29-W7-O16                            | 81.2(4)  |
| O34-W7-O16               | 83.0(5)  | O34-W7-O29                            | 83.1(4)  |
| O40-W7-O16               | 173.7(5) | O40-W7-O21                            | 100.2(6) |
| O40-W7-O28               | 96.3(5)  | O40-W7-O29                            | 92.6(6)  |

|             |          |             |          |
|-------------|----------|-------------|----------|
| O40-W7-O34  | 96.7(6)  | O19-W8-O20  | 82.4(5)  |
| O19-W8-O32  | 165.8(5) | O19-W8-O33  | 88.7(6)  |
| O25-W8-19   | 87.9(4)  | O25-W8-O20  | 84.9(4)  |
| O25-W8-O32  | 88.1(5)  | O25-W8-O33  | 157.7(5) |
| O32-W8-O20  | 83.7(5)  | O33-W8-O20  | 72.8(5)  |
| O33-W8-O32  | 89.8(6)  | O41-W8-O19  | 97.3(5)  |
| O41-W8-O20  | 172.5(6) | O41-W8-O25  | 102.6(6) |
| O41-W8-O32  | 96.9(5)  | O41-W8-O33  | 99.7(7)  |
| O29-W9-O26  | 84.3(4)  | O29-W9-O32  | 91.8(5)  |
| O29-W9-O36  | 86.0(5)  | O29-W9-O37  | 156.5(5) |
| O32-W9-O26  | 84.3(5)  | O32-W9-O36  | 167.2(5) |
| O32-W9-O37  | 89.8(6)  | O36-W9-O26  | 82.9(5)  |
| O37-W9-O26  | 72.5(5)  | O37-W9-O36  | 87.3(6)  |
| O43-W9-O26  | 172.5(6) | O43-W9-O29  | 102.6(6) |
| O43-W9-O32  | 98.1(5)  | O43-W9-O36  | 94.6(5)  |
| O43-W9-O37  | 100.3(7) | O24-W10-O35 | 79.8(5)  |
| O24-W10-O38 | 84.6(6)  | O34-W10-O24 | 89.1(5)  |
| O34-W10-O35 | 84.6(4)  | O34-W10-O38 | 157.9(5) |
| O36-W10-O24 | 162.6(5) | O36-W10-O34 | 89.4(5)  |
| O36-W10-O35 | 82.8(5)  | O36-W10-O38 | 90.3(6)  |
| O38-W10-O35 | 73.5(5)  | O42-W10-O24 | 97.7(5)  |
| O42-W10-O34 | 101.9(7) | O42-W10-O35 | 173.1(6) |
| O42-W10-O36 | 99.5(5)  | O42-W10-O38 | 99.9(7)  |

---

**Table S5.** Bond valence sum calculations of ordered P, W and O atoms of compound 1.

| Atom Code | Bond Valence | Valence State | Atom Code | Bond Valence | Valence State |
|-----------|--------------|---------------|-----------|--------------|---------------|
| W1        | 6.218        | +6            | W6        | 6.068        | +6            |
| W2        | 6.072        | +6            | W7        | 6.113        | +6            |
| W3        | 6.047        | +6            | W8        | 6.125        | +6            |
| W4        | 6.097        | +6            | W9        | 6.264        | +6            |
| W5        | 6.161        | +6            | W10       | 6.120        | +6            |
| P1        | 5.001        | +5            | P2        | 5.008        | +5            |
| P3        | 4.808        | +5            | O2        | 1.890        | -2            |
| O3        | 1.968        | -2            | O4        | 1.999        | -2            |
| O5        | 1.928        | -2            | O6        | 1.971        | -2            |
| O7        | 1.885        | -2            | O8        | 2.057        | -2            |
| O9        | 1.962        | -2            | O10       | 1.956        | -2            |
| O11       | 1.931        | -2            | O12       | 1.984        | -2            |
| O13       | 2.018        | -2            | O14       | 1.781        | -2            |
| O15       | 2.005        | -2            | O16       | 1.778        | -2            |
| O17       | 1.635        | -2            | O18       | 1.698        | -2            |
| O19       | 1.915        | -2            | O20       | 2.011        | -2            |
| O22       | 2.109        | -2            | O23       | 1.662        | -2            |
| O24       | 1.943        | -2            | O25       | 2.030        | -2            |
| O26       | 1.921        | -2            | O28       | 2.094        | -2            |
| O29       | 1.993        | -2            | O30       | 1.653        | -2            |
| O31       | 1.609        | -2            | O32       | 2.058        | -2            |
| O33       | 1.957        | -2            | O34       | 2.044        | -2            |
| O35       | 1.925        | -2            | O36       | 1.941        | -2            |
| O37       | 1.931        | -2            | O38       | 1.854        | -2            |
| O40       | 1.562        | -2            | O41       | 1.658        | -2            |
| O42       | 1.667        | -2            | O43       | 1.712        | -2            |



**Table S6.** Comparison of various proton conducting materials.

| Compound                                                                                                               | $\sigma$ (S cm <sup>-1</sup> ) | $E_a$ (eV)  | Conditions           | Type             |
|------------------------------------------------------------------------------------------------------------------------|--------------------------------|-------------|----------------------|------------------|
| <b>Compound 1</b>                                                                                                      | <b>3.00×10<sup>-2</sup></b>    | <b>0.28</b> | <b>368 K, 98% RH</b> | <b>This work</b> |
| {Ce <sub>11</sub> Mo <sub>96</sub> } <sup>5</sup>                                                                      | 9.01×10 <sup>-2</sup>          | 0.38        | 353 K, 98% RH        |                  |
| {Ln <sub>10</sub> Ni <sub>48</sub> } <sup>6</sup>                                                                      | 2.05×10 <sup>-2</sup>          | 0.22        | 295 K, 100% RH       |                  |
| 3D-{Mo <sub>154</sub> }n <sup>7</sup>                                                                                  | 1.10×10 <sup>-2</sup>          | 0.26        | 298 K, 100% RH       | POMs             |
| [P <sub>5</sub> W <sub>30</sub> ] <sub>2</sub> C-{Mo <sub>22</sub> Fe <sub>8</sub> } <sup>8</sup>                      | 1.70×10 <sup>-2</sup>          | 0.31        | 368 K, 90% RH        |                  |
| {BiP <sub>5</sub> W <sub>30</sub> -PAA} <sup>9</sup>                                                                   | 1.70×10 <sup>-3</sup>          | 0.24        | 338 K, 75% RH        |                  |
| Zr-TCPBP-HCl <sup>10</sup>                                                                                             | 1.20×10 <sup>-3</sup>          | 0.17        | 341 K, 98% RH        |                  |
| MFM-300(Cr)-SO <sub>4</sub> (H <sub>2</sub> O) <sub>2</sub> <sup>11</sup>                                              | 1.26×10 <sup>-2</sup>          | 0.04        | 298 K, 99% RH        | MOFs             |
| H <sub>3</sub> PO <sub>4</sub> @NKCOF-54 <sup>12</sup>                                                                 | 2.33×10 <sup>-2</sup>          | 0.29        | 433 K, anhydrous     | COFs             |
| H@TPT-COF <sup>13</sup>                                                                                                | 1.27×10 <sup>-2</sup>          | 0.17        | 433 K, anhydrous     |                  |
| HOF-FJU-36 <sup>14</sup>                                                                                               | 2.83×10 <sup>-5</sup>          | 0.66        | 323 K, 55% RH        |                  |
| [(CN <sub>3</sub> H <sub>6</sub> ) <sub>2</sub> (C <sub>10</sub> O <sub>8</sub> H <sub>4</sub> )] (GC-2) <sup>15</sup> | 1.78×10 <sup>-2</sup>          | 0.46        | 298 K, 98% RH        | HOFS             |

NKCOF=Nankai Covalent Organic Framework; FJU=Fujian Normal University

**Table S7.** Optimization of **1** for reduction of nitrobenzene to aniline <sup>a</sup>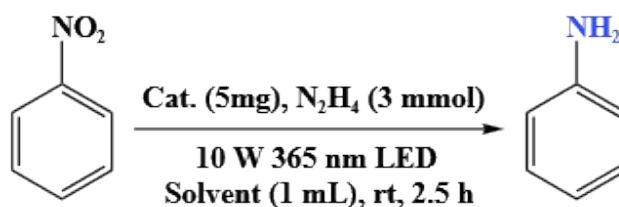

| Entry | Catalyst (mg) | Solvent                            | Yield (%) <sup>b</sup> |
|-------|---------------|------------------------------------|------------------------|
| 1     | 5             | CH <sub>3</sub> OH                 | 98.55                  |
| 2     | 5             | CH <sub>3</sub> CN                 | 10.26                  |
| 3     | 5             | CH <sub>3</sub> CH <sub>2</sub> OH | 73.58                  |
| 4     | 5             | n-hexane                           | 14.04                  |
| 5     | 5             | acetone                            | trace                  |
| 6     | 5             | CH <sub>2</sub> Cl <sub>2</sub>    | 49.99                  |
| 7     | 5             | methylbenzene                      | 28.26                  |
| 8     | 10            | CH <sub>3</sub> OH                 | 94.85                  |
| 9     | 2.5           | CH <sub>3</sub> OH                 | 90                     |

<sup>a</sup> **1** (5 mg), substrate (0.5 mmol), CH<sub>3</sub>OH (1 mL), N<sub>2</sub>H<sub>4</sub>·H<sub>2</sub>O (3 mmol), N<sub>2</sub> (1 atm), 10 W 365 nm LED lamp, rt, 2.5 h. <sup>b</sup> Determined by GC analysis.

**Table S8.** Summary of the yield of the reduction of nitrobenzene with different catalysts.

| Entry | Catalyst                                                                                                                                                                                                                                                                                       | Temperature/<br>°C | Light source  | Hydrogen source                               | Time/h | Yield/% | Ref.             |
|-------|------------------------------------------------------------------------------------------------------------------------------------------------------------------------------------------------------------------------------------------------------------------------------------------------|--------------------|---------------|-----------------------------------------------|--------|---------|------------------|
| 1     | $\text{Na}_6\text{K}_6\text{H}_{25}[(\text{P}_6\text{W}_{37}\text{O}_{127})\{\text{Ag}_2(\text{Ag}_6\text{O}_{19})\}]\cdot 5\text{H}_2\text{O}$                                                                                                                                                | RT                 | 365 nm        | $\text{N}_2\text{H}_4\cdot\text{H}_2\text{O}$ | 2.5    | 98.55   | <b>This work</b> |
| 2     | $\text{Na}_5\text{H}_{5.68}[\text{Na}_{0.17}\text{Rh}_{0.83}^{\text{III}}(\text{C}_6\text{H}_8\text{N}_2)_2\text{Cl}_2]_2(\text{C}_8\text{H}_8\text{N}_2)_2[\text{As}_4\text{W}_{40}\text{O}_{140}\text{Rh}_4^{\text{IV}}(\text{C}_6\text{H}_4\text{N}_2\text{S})_2]\cdot n\text{H}_2\text{O}$ | RT                 | Visible light | $\text{N}_2\text{H}_4\cdot\text{H}_2\text{O}$ | 6      | 96      | 16               |
| 3     | $\text{Cs}_4\text{Na}_2\text{H}_2[\text{Te}_2\text{W}_{20}\text{O}_{72}(\text{H}_2\text{O})\{(\text{C}_6\text{H}_6)\text{Ru}\}_4]\cdot 12\text{H}_2\text{O}$                                                                                                                                   | RT                 | Visible light | $\text{N}_2\text{H}_4\cdot\text{H}_2\text{O}$ | 6      | 99.8    | 17               |
| 4     | ZnW-TPT                                                                                                                                                                                                                                                                                        | RT                 | 365 nm        | $\text{N}_2\text{H}_4\cdot\text{H}_2\text{O}$ | 6      | 99      | 18               |
| 5     | Cu(I)-TPT                                                                                                                                                                                                                                                                                      | RT                 | 365 nm        | $\text{N}_2\text{H}_4\cdot\text{H}_2\text{O}$ | 8      | 99      | 19               |
| 6     | CoW-TPT                                                                                                                                                                                                                                                                                        | RT                 | 365 nm        | TEOA                                          | 12     | 94.71   | 20               |
| 7     | 1-Sb <sub>8</sub> Mo <sub>18</sub>                                                                                                                                                                                                                                                             | 80                 | /             | $\text{N}_2\text{H}_4\cdot\text{H}_2\text{O}$ | 2      | 100     | 21               |

**Table S9.** The table of catalytic reduction of N-phenylhydroxylamine and azobenzene by **1**<sup>a</sup>.

| Entry | Substrate                                                                           | Yield <sup>b</sup> (%) |
|-------|-------------------------------------------------------------------------------------|------------------------|
| 1     | 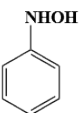 | 43.88                  |
| 2     |  | -                      |

<sup>a</sup> Catalyst **1** (5 mg), substrate (0.5 mmol), CH<sub>3</sub>OH (1 mL), N<sub>2</sub>H<sub>4</sub>·H<sub>2</sub>O (3 mmol), N<sub>2</sub> (1 atm), a 10 W 365 nm LED lamp, rt, and 2.5 h. <sup>b</sup> Isolated yields.

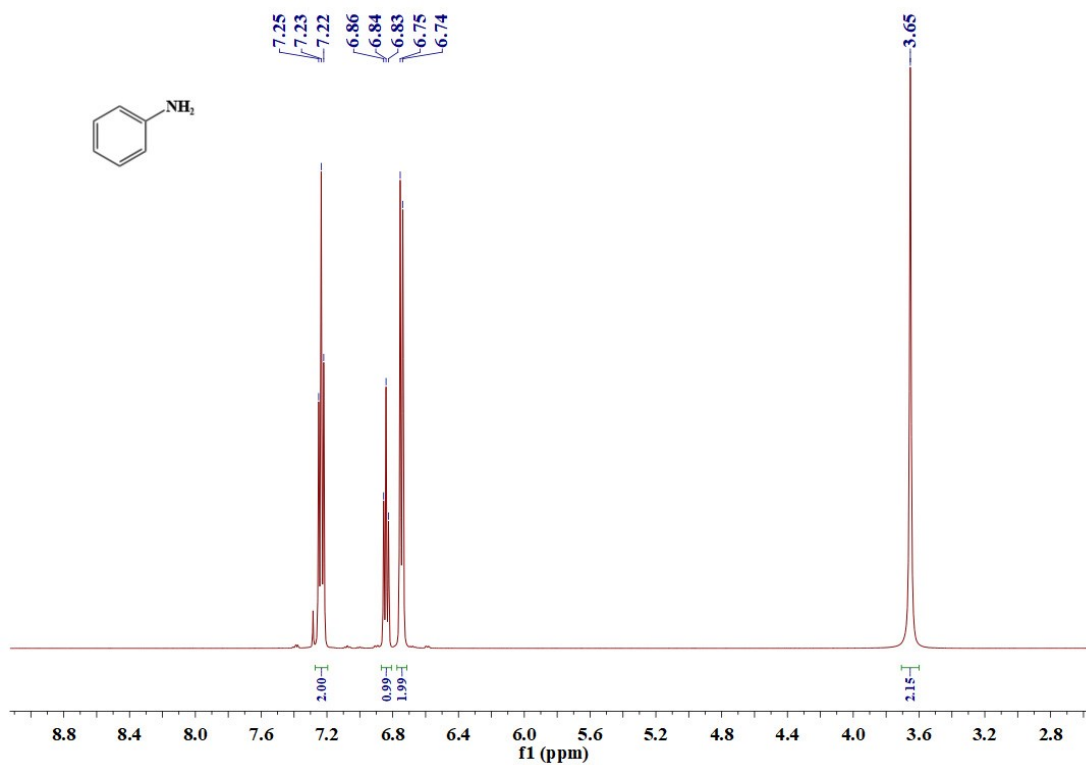

**Figure S10.**  $^1\text{H}$  NMR spectra of **Aniline** (500 MHz,  $\text{CDCl}_3$ ).

$^1\text{H}$  NMR (500 MHz,  $\text{CDCl}_3$ )  $\delta$  7.23 (t,  $J = 7.7$  Hz, 2H), 6.84 (t,  $J = 7.4$  Hz, 1H), 6.75 (d,  $J = 8.1$  Hz, 2H), 3.65 (s, 2H).

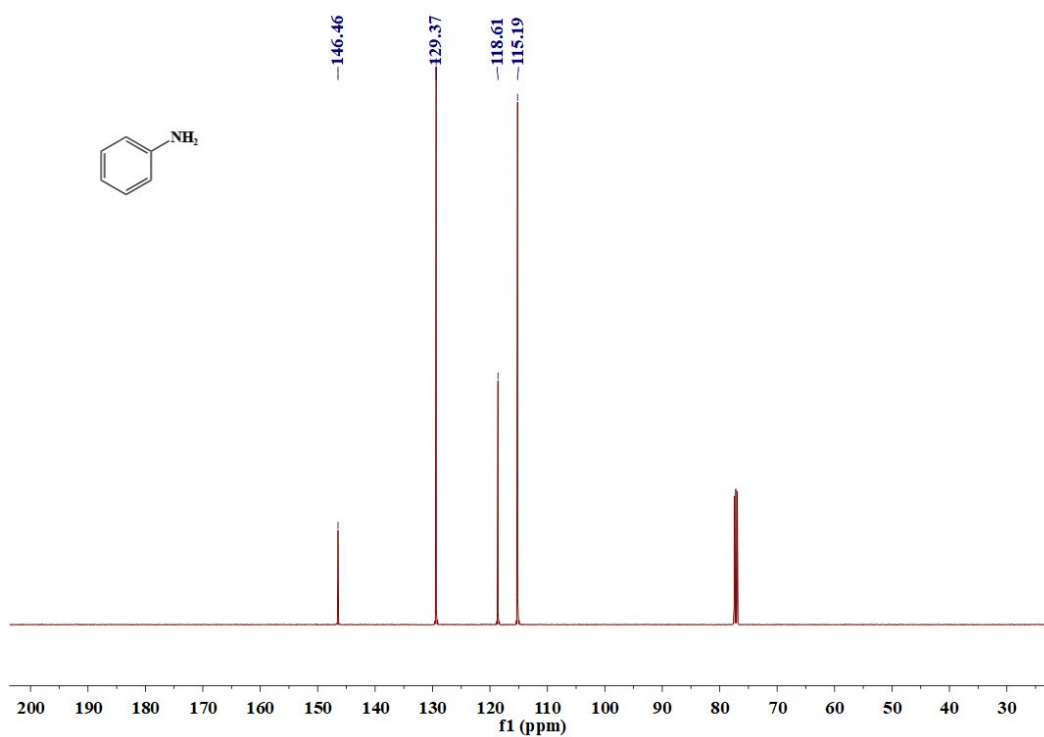

**Figure S11.**  $^{13}\text{C}$  NMR spectra of **Aniline** (126 MHz,  $\text{CDCl}_3$ ).

$^{13}\text{C}$  NMR (126 MHz,  $\text{CDCl}_3$ )  $\delta$  146.46 (s), 129.37 (s), 118.61 (s), 115.19 (s).

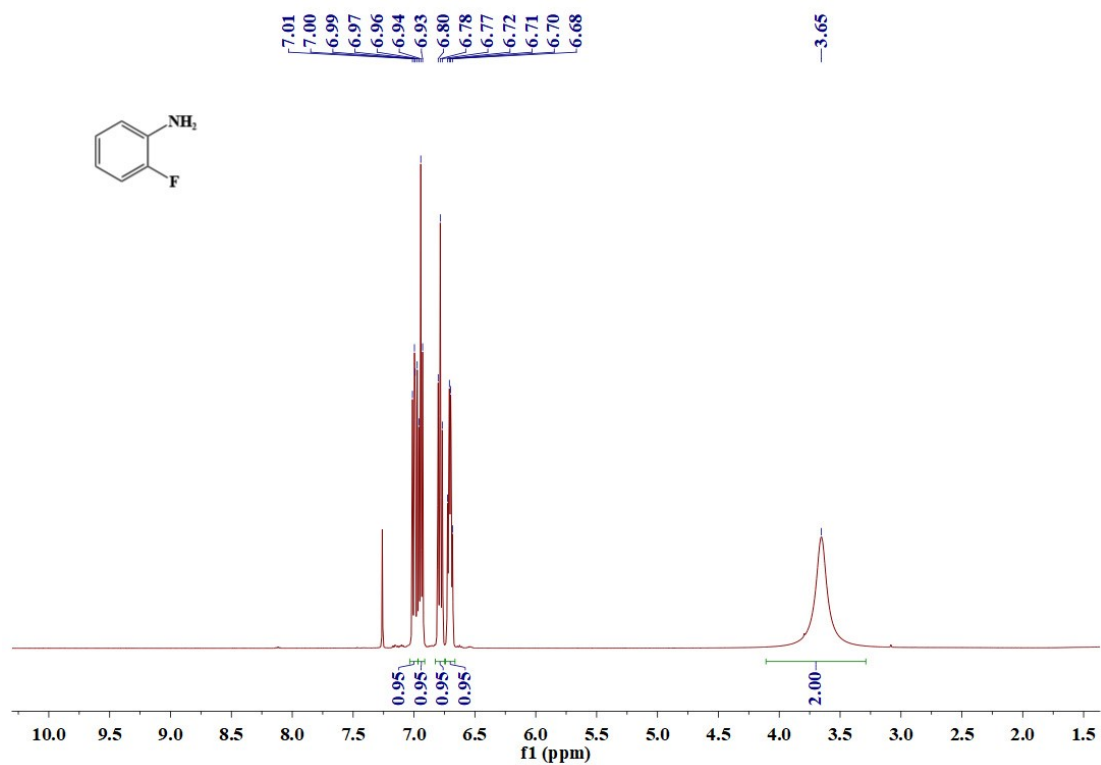

**Figure S12.**  $^1\text{H}$  NMR spectra of **2-Fluoroaniline** (500 MHz,  $\text{CDCl}_3$ ).

$^1\text{H}$  (500 MHz,  $\text{CDCl}_3$ )  $\delta$  6.99 (dd,  $J = 11.3, 8.2$  Hz, 1H), 6.94 (t,  $J = 7.6$  Hz, 1H), 6.78 (t,  $J = 8.4$  Hz, 1H), 6.70 (dd,  $J = 12.7, 7.6$  Hz, 1H), 3.65 (s, 2H).

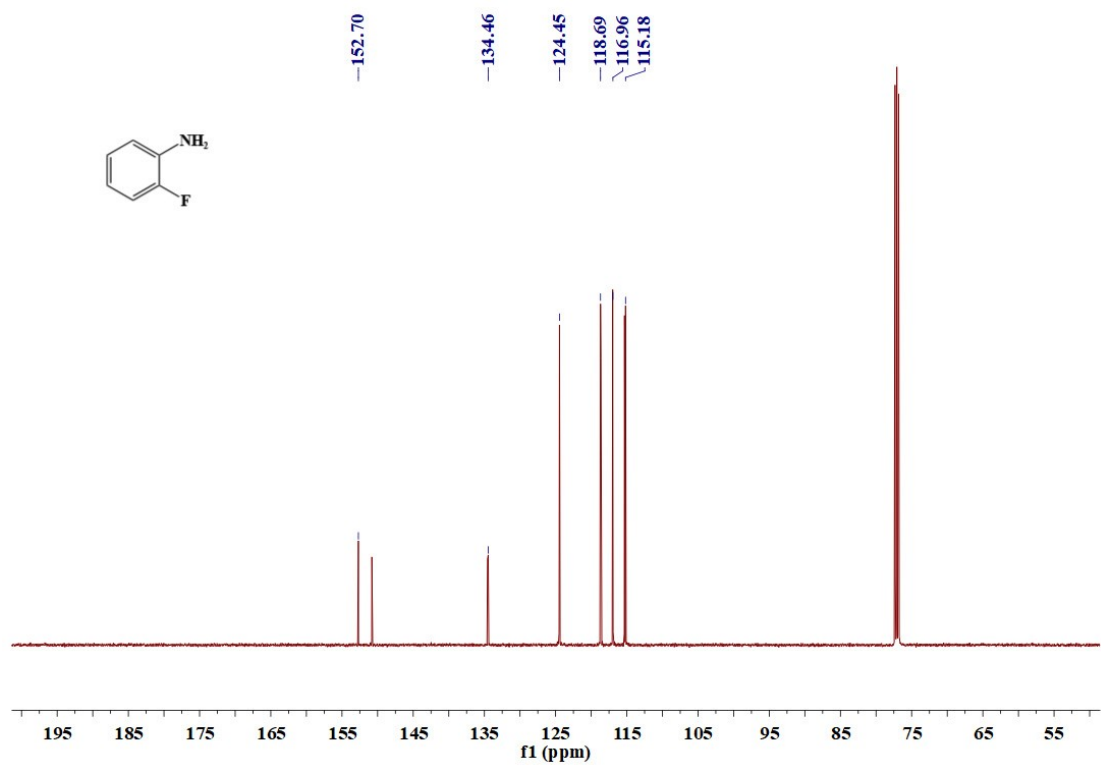

**Figure S13.**  $^{13}\text{C}$  NMR spectra of **2-Fluoroaniline** (126 MHz,  $\text{CDCl}_3$ ).

$^{13}\text{C}$  NMR (126 MHz,  $\text{CDCl}_3$ )  $\delta$  152.70 (s), 134.46 (s), 124.45 (s), 118.69 (s), 116.96 (s), 115.18 (s).

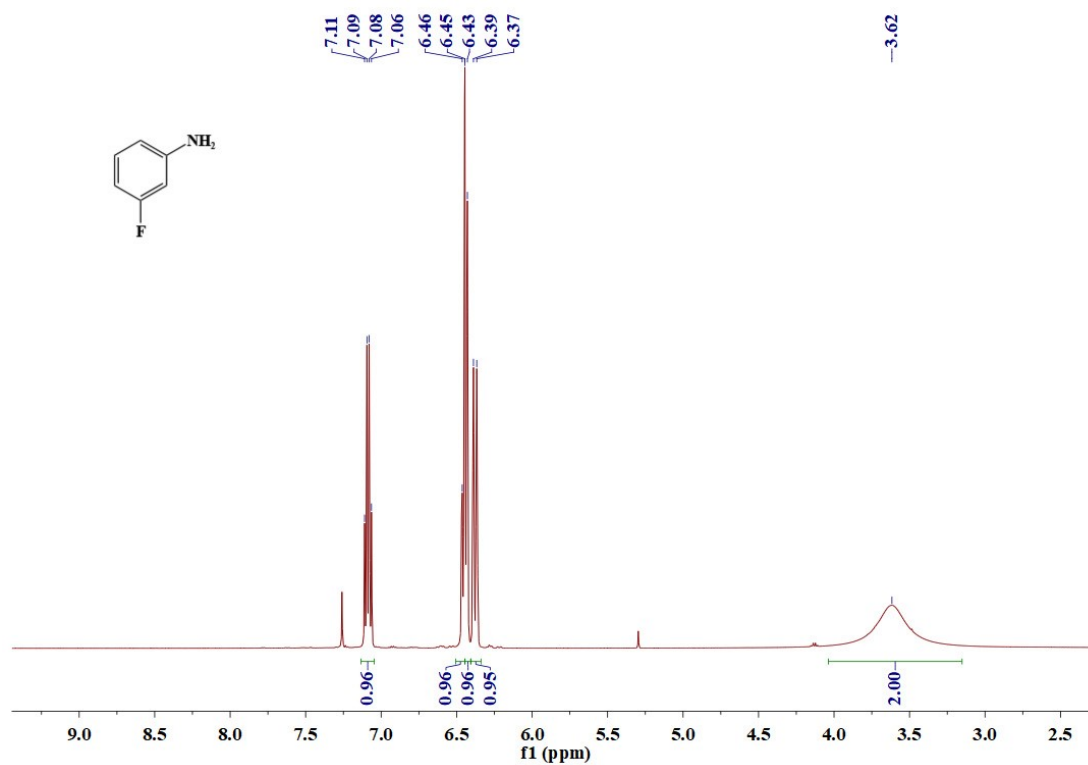

**Figure S14.** <sup>1</sup>H NMR spectra of **3-Fluoroaniline** (500 MHz, CDCl<sub>3</sub>).

<sup>1</sup>H (500 MHz, CDCl<sub>3</sub>) δ 7.09 (dd, J = 15.0, 7.8 Hz, 1H), 6.45 (d, J = 8.9 Hz, 1H), 6.43 (s, 1H), 6.38 (d, J = 10.9 Hz, 1H), 3.62 (s, 2H)

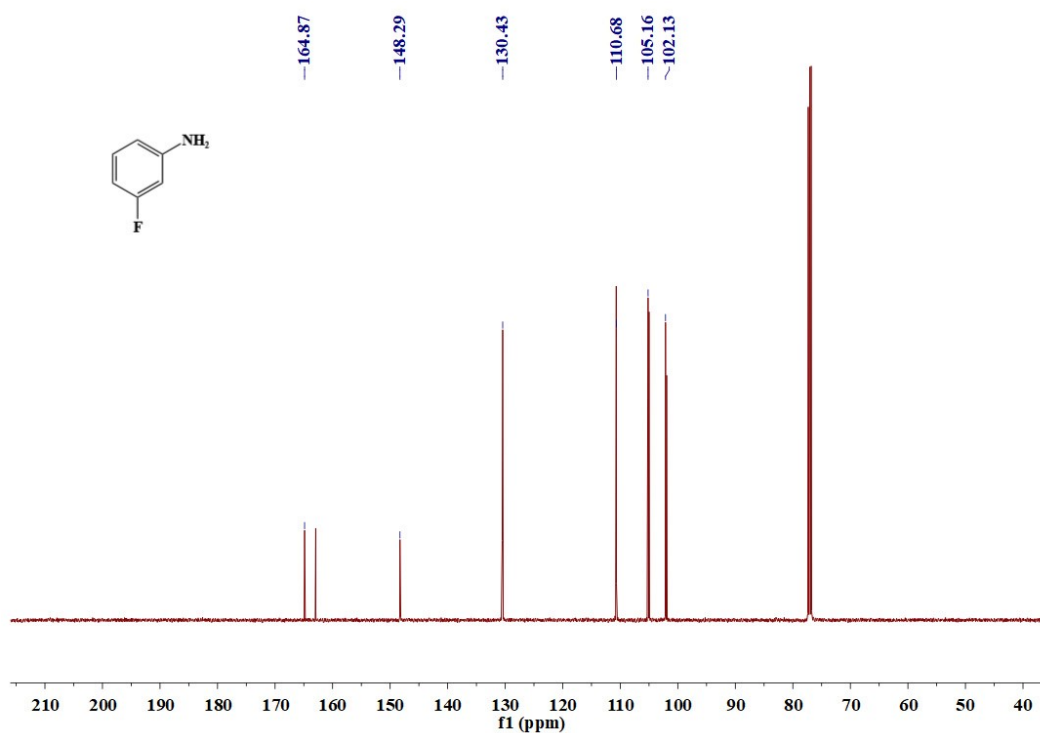

**Figure S15.** <sup>13</sup>C NMR spectra of **3-Fluoroaniline** (126 MHz, CDCl<sub>3</sub>).

<sup>13</sup>C NMR (126 MHz, CDCl<sub>3</sub>) δ 164.87 (s), 148.29 (s), 130.43 (s), 110.68 (s), 105.16 (s), 102.13 (s).

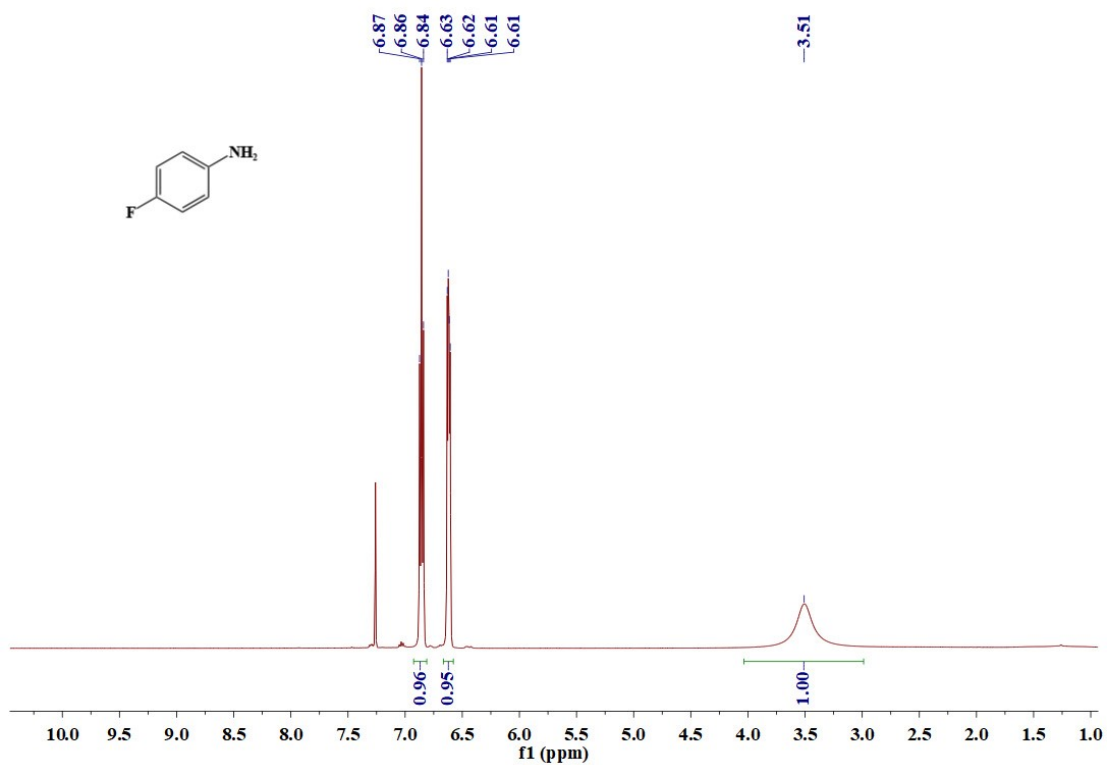

**Figure S16.**  $^1\text{H}$  NMR spectra of 4-Fluoroaniline (500 MHz,  $\text{CDCl}_3$ ).

$^1\text{H}$  (500 MHz,  $\text{CDCl}_3$ )  $\delta$  6.86 (t,  $J$  = 8.6 Hz, 2H), 6.62 (dd,  $J$  = 8.7, 4.4 Hz, 2H), 3.51 (s, 2H).

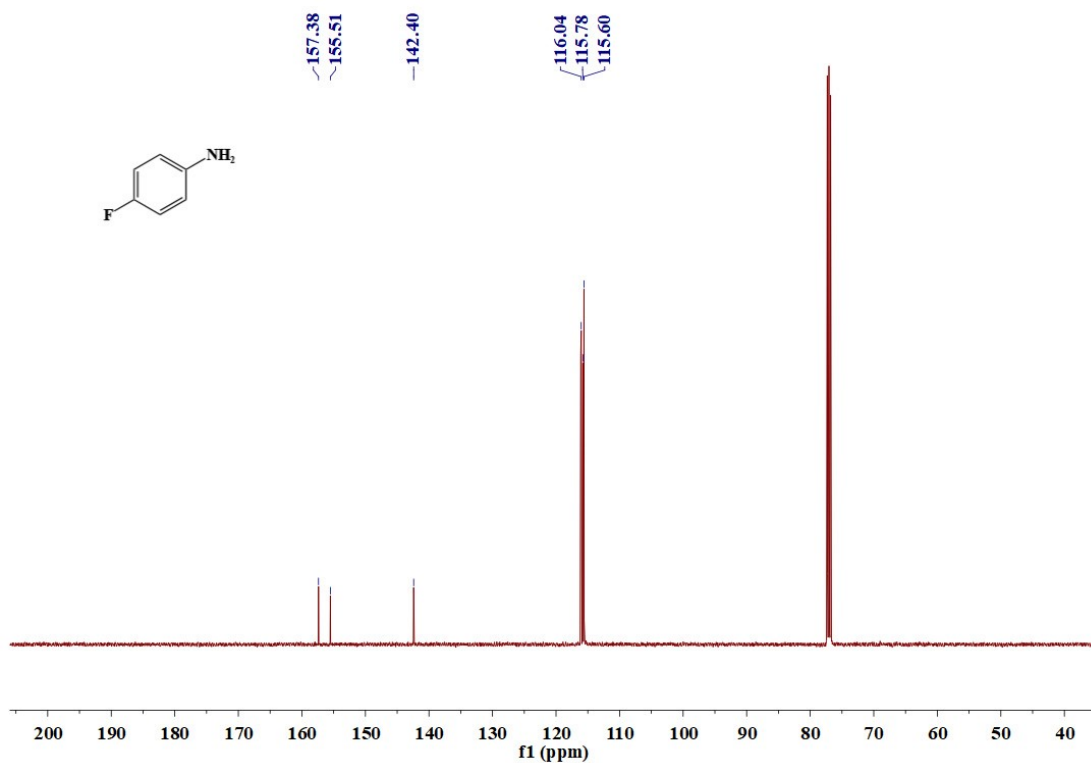

**Figure S17.**  $^{13}\text{C}$  NMR spectra of 4-Fluoroaniline (126 MHz,  $\text{CDCl}_3$ ).

$^{13}\text{C}$  NMR (126 MHz,  $\text{CDCl}_3$ )  $\delta$  157.38 (s), 155.51 (s), 142.40 (s), 116.04 (s), 115.78 (s), 115.60 (s)

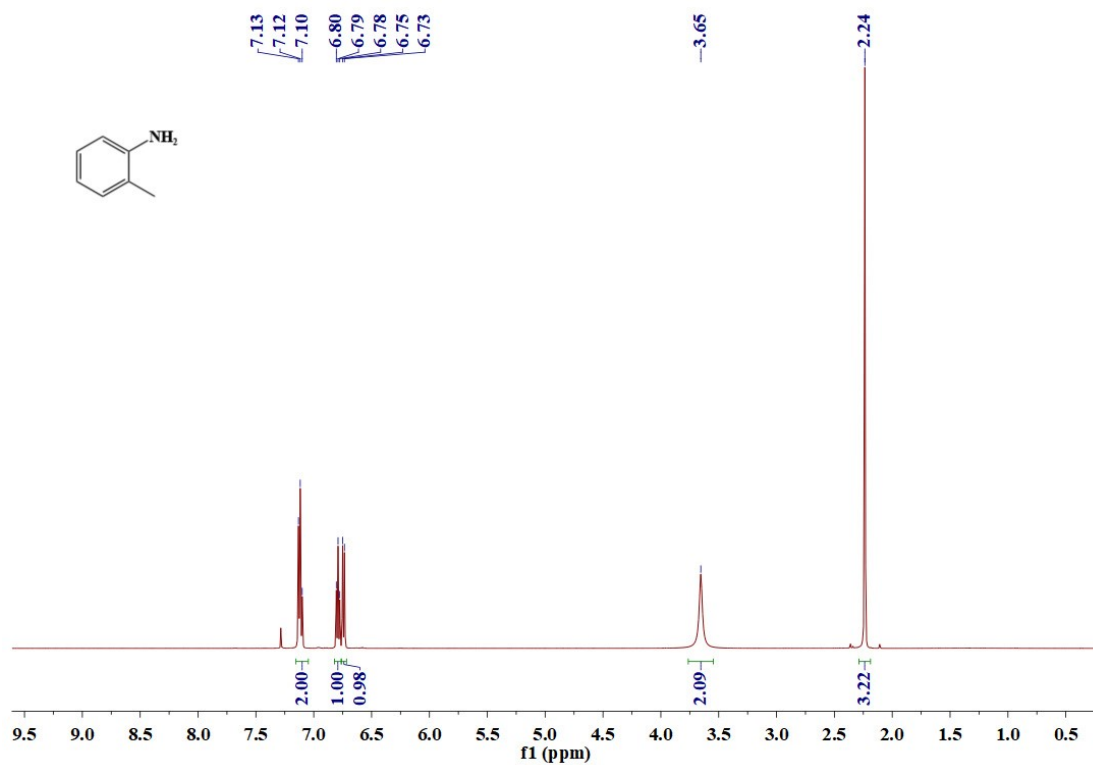

**Figure S18.**  $^1\text{H}$  NMR spectra of **o-Toluidine** (500 MHz,  $\text{CDCl}_3$ ).

$^1\text{H}$  (500 MHz,  $\text{CDCl}_3$ )  $\delta$  7.12 (t,  $J = 8.1$  Hz, 2H), 6.79 (t,  $J = 7.4$  Hz, 1H), 6.74 (d,  $J = 7.7$  Hz, 1H), 3.65 (s, 2H), 2.24 (s, 3H).

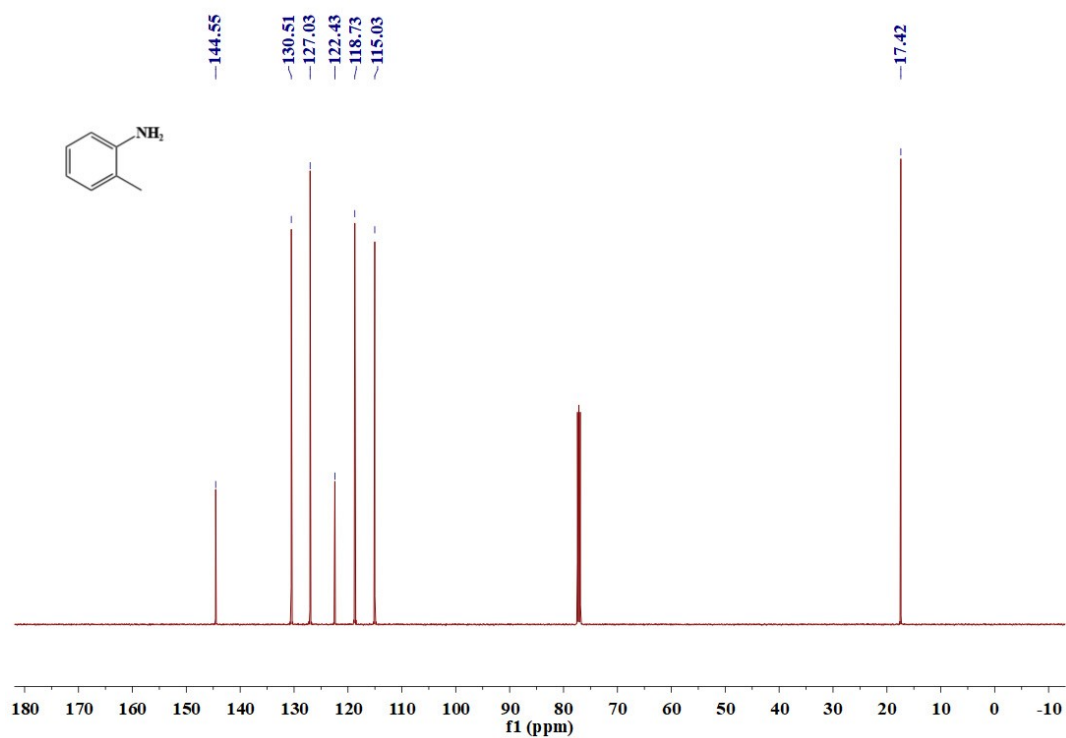

**Figure S19.**  $^{13}\text{C}$  NMR spectra of **o-Toluidine** (126 MHz,  $\text{CDCl}_3$ ).

$^{13}\text{C}$  NMR (126 MHz,  $\text{CDCl}_3$ )  $\delta$  144.55 (s), 130.51 (s), 127.03 (s), 122.43 (s), 118.73 (s), 115.03 (s), 17.42 (s).

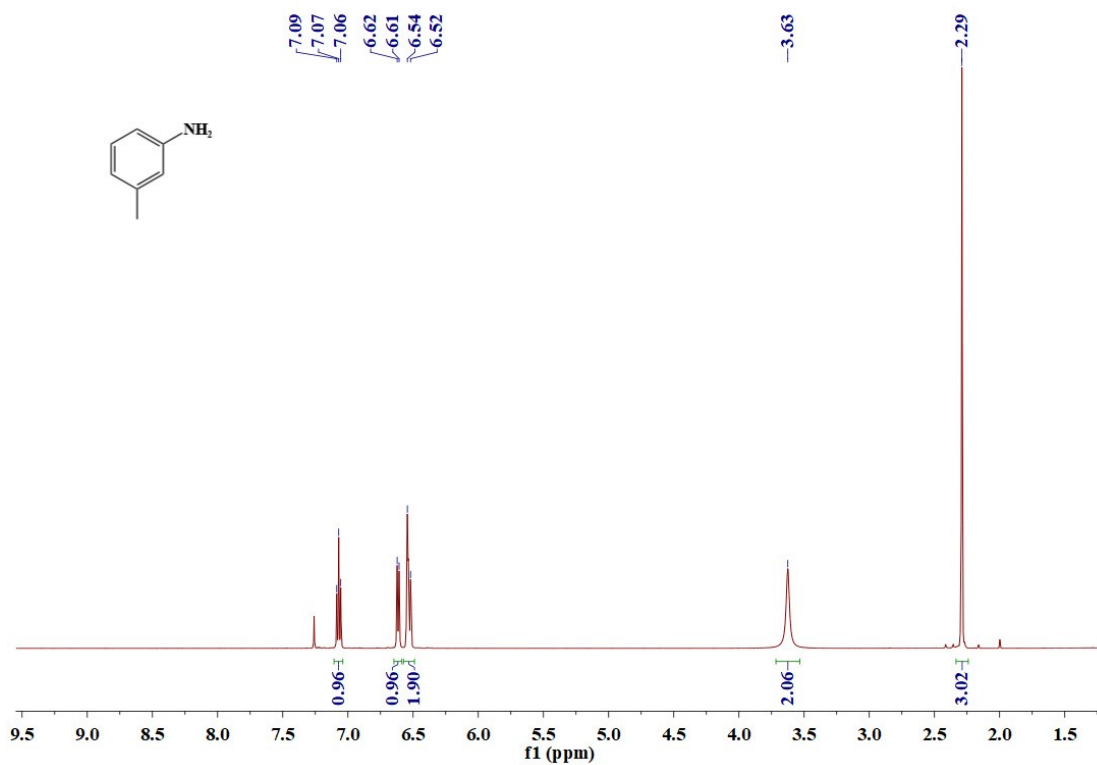

**Figure S20.** <sup>1</sup>H NMR spectra of m-Toluidine (500 MHz, CDCl<sub>3</sub>).

<sup>1</sup>H (500 MHz, CDCl<sub>3</sub>) δ 7.07 (t, J = 7.6 Hz, 1H), 6.61 (d, J = 7.5 Hz, 1H), 6.53 (d, J = 12.3 Hz, 2H), 3.63 (s, 2H), 2.29 (s, 3H).

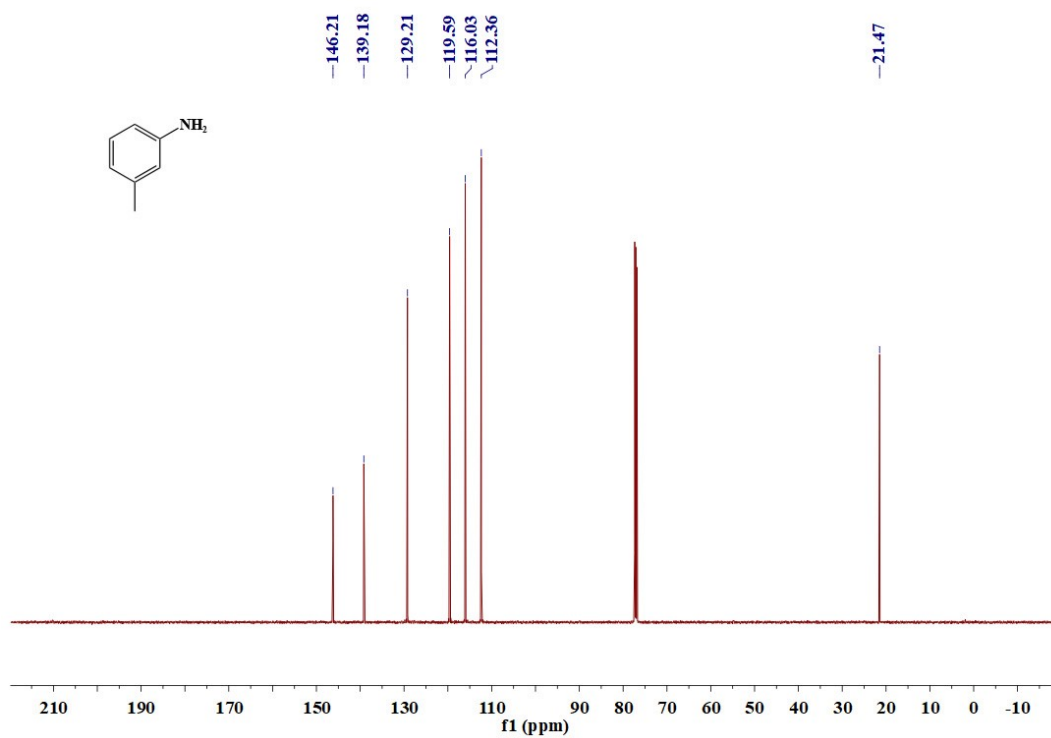

**Figure S21.** <sup>13</sup>C NMR spectra of m-Toluidine (126 MHz, CDCl<sub>3</sub>).

<sup>13</sup>C NMR (126 MHz, CDCl<sub>3</sub>) δ 146.21 (s), 139.18 (s), 129.21 (s), 119.59 (s), 116.03 (s), 112.36 (s), 21.47 (s).



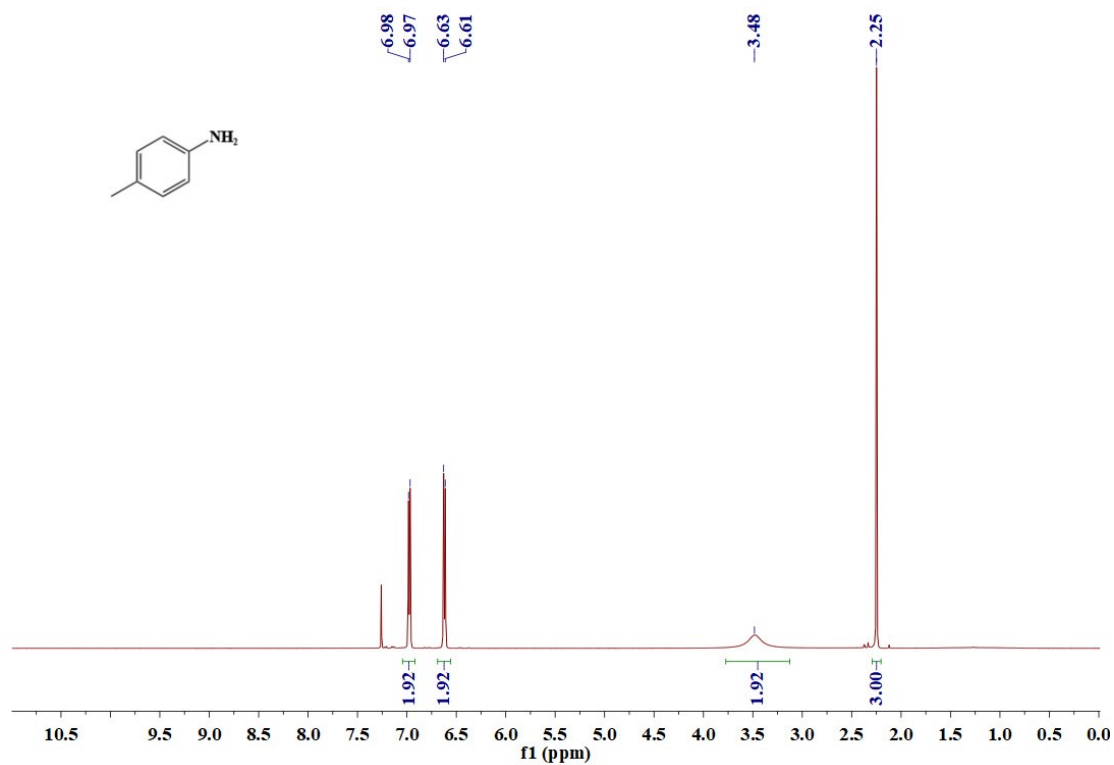

**Figure S22.**  $^1\text{H}$  NMR spectra of **p-Toluidine** (500 MHz,  $\text{CDCl}_3$ ).

$^1\text{H}$  (500 MHz,  $\text{CDCl}_3$ )  $\delta$  6.98 (d,  $J = 8.0$  Hz, 2H), 6.62 (d,  $J = 8.0$  Hz, 2H), 3.48 (s, 2H), 2.25 (s, 3H).

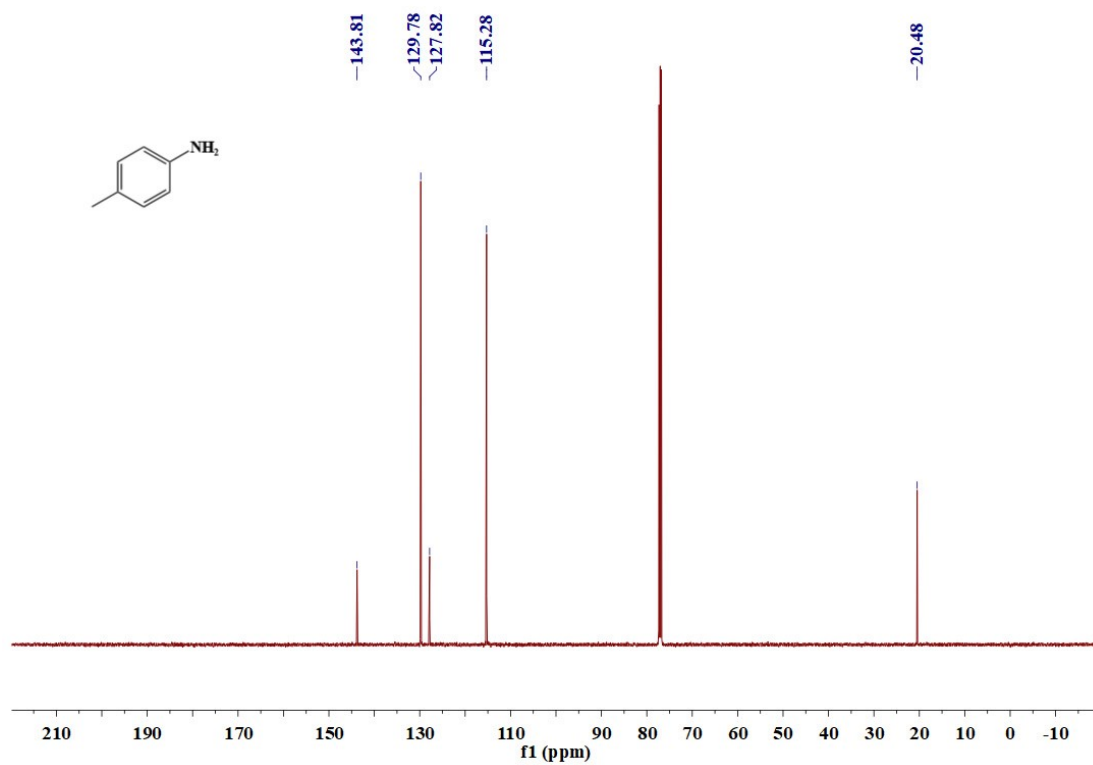

**Figure S23.**  $^{13}\text{C}$  NMR spectra of **p-Toluidine** (126 MHz,  $\text{CDCl}_3$ ).

$^{13}\text{C}$  NMR (126 MHz,  $\text{CDCl}_3$ )  $\delta$  143.81 (s), 129.78 (s), 127.82 (s), 115.28 (s), 20.48 (s).

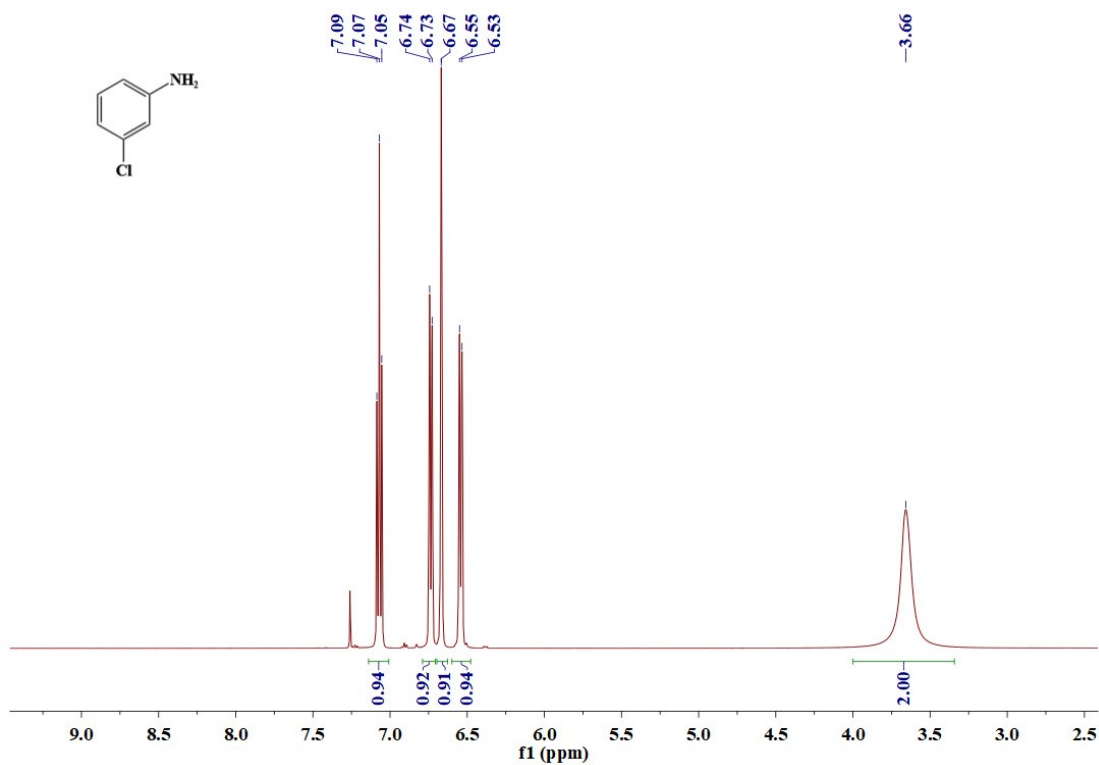

**Figure S24.**  $^1\text{H}$  NMR spectra of **3-Chloroaniline** (500 MHz,  $\text{CDCl}_3$ ).

$^1\text{H}$  (500 MHz,  $\text{CDCl}_3$ )  $\delta$  7.07 (t,  $J = 8.0$  Hz, 1H), 6.74 (d,  $J = 8.0$  Hz, 1H), 6.67 (s, 1H), 6.54 (d,  $J = 8.1$  Hz, 1H), 3.66 (s, 2H).

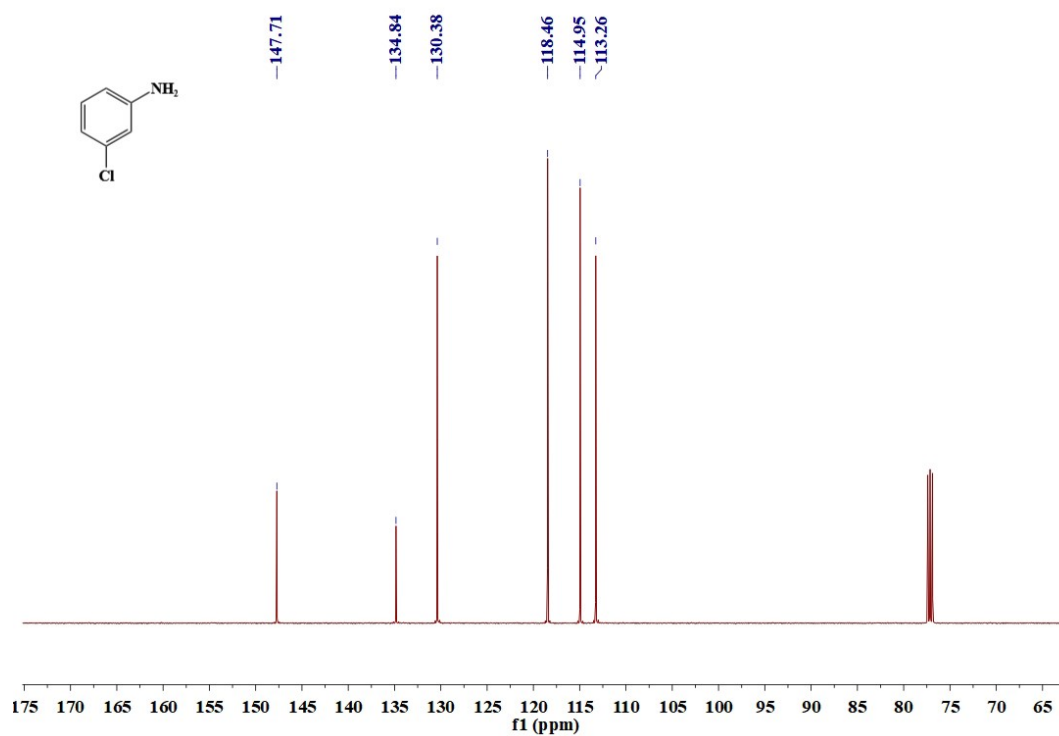

**Figure S25.**  $^{13}\text{C}$  NMR spectra of **3-Chloroaniline** (126 MHz,  $\text{CDCl}_3$ ).

$^{13}\text{C}$  NMR (126 MHz,  $\text{CDCl}_3$ )  $\delta$  147.71 (s), 134.84 (s), 130.38 (s), 118.46 (s), 114.95 (s), 113.26 (s).

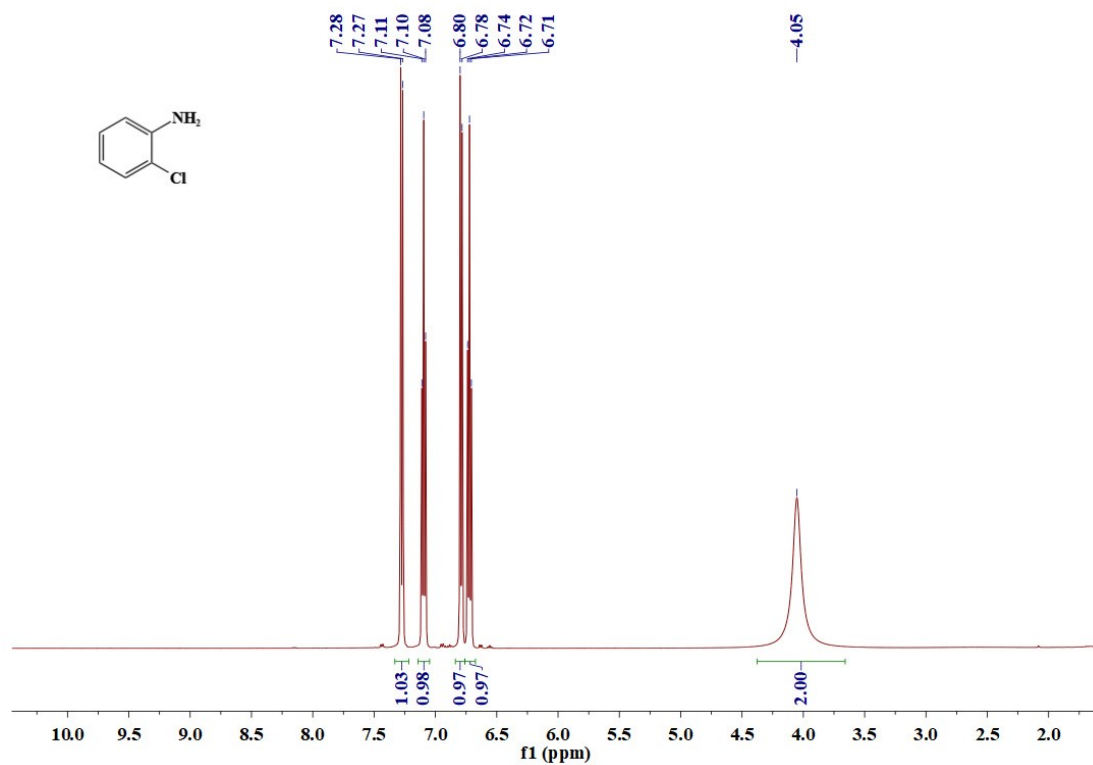

**Figure S26.**  $^1\text{H}$  NMR spectra of **2-Chloroaniline** (500 MHz,  $\text{CDCl}_3$ ).

$^1\text{H}$  (500 MHz,  $\text{CDCl}_3$ )  $\delta$  7.27 (d,  $J = 8.1$  Hz, 1H), 7.10 (t,  $J = 7.7$  Hz, 1H), 6.79 (d,  $J = 8.0$  Hz, 1H), 6.72 (t,  $J = 7.6$  Hz, 1H), 4.05 (s, 2H).

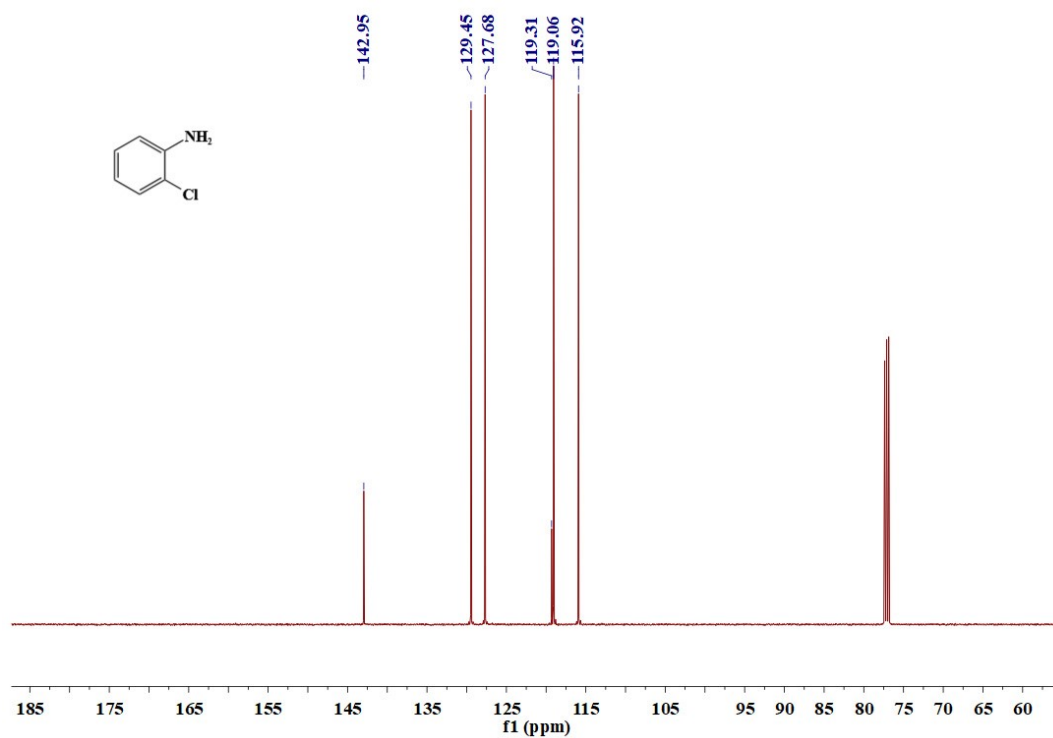

**Figure S27.**  $^{13}\text{C}$  NMR spectra of **2-Chloroaniline** (126 MHz,  $\text{CDCl}_3$ ).

$^{13}\text{C}$  NMR (126 MHz,  $\text{CDCl}_3$ )  $\delta$  142.95 (s), 129.45 (s), 127.68 (s), 119.31 (s), 119.06 (s), 115.92 (s).

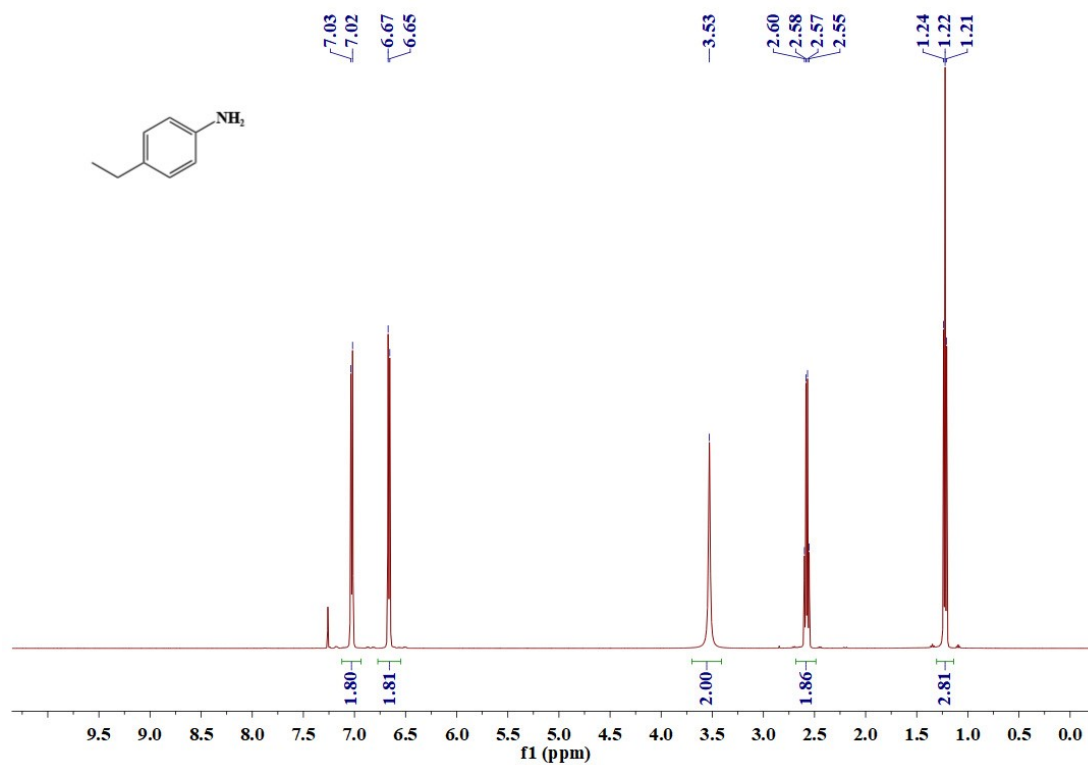

**Figure S28.** <sup>1</sup>H NMR spectra of 4-Ethylaniline (500 MHz, CDCl<sub>3</sub>).

<sup>1</sup>H (500 MHz, CDCl<sub>3</sub>) δ 7.03 (d, J = 8.1 Hz, 2H), 6.66 (d, J = 8.2 Hz, 2H), 3.53 (s, 2H), 2.58 (q, J = 7.6 Hz, 2H), 1.22 (t, J = 7.6 Hz, 3H).

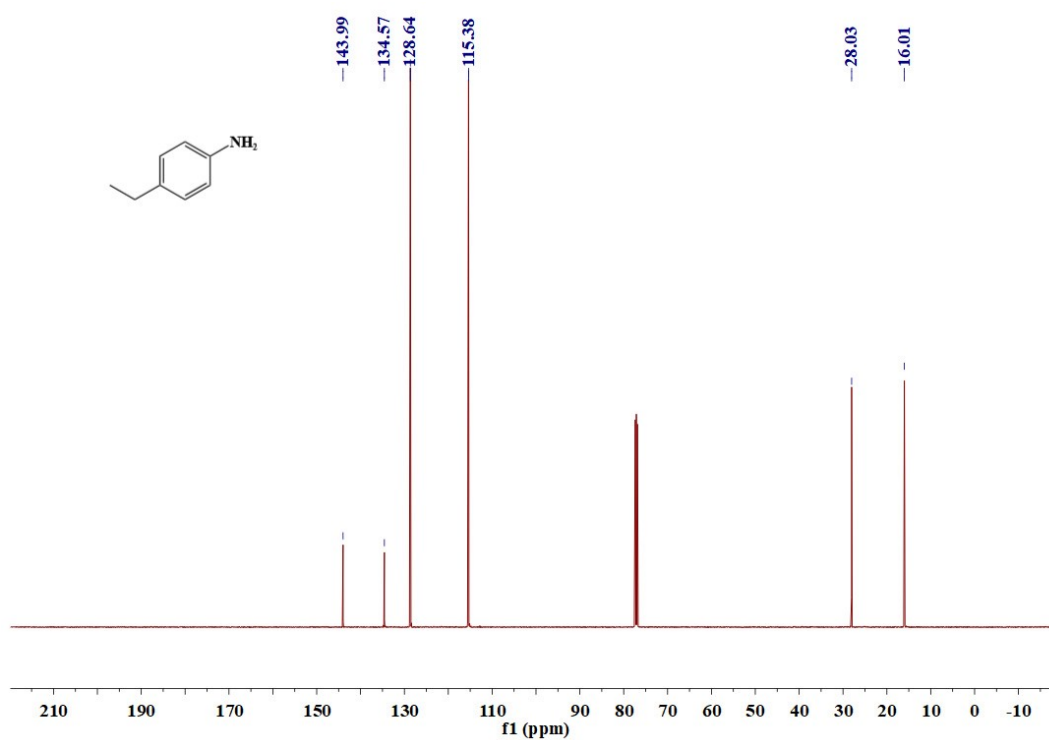

**Figure S29.** <sup>13</sup>C NMR spectra of 4-Ethylaniline (126 MHz, CDCl<sub>3</sub>).

<sup>13</sup>C NMR (126 MHz, CDCl<sub>3</sub>) δ 143.99 (s), 134.57 (s), 128.64 (s), 115.38 (s), 28.03 (s), 16.01 (s).

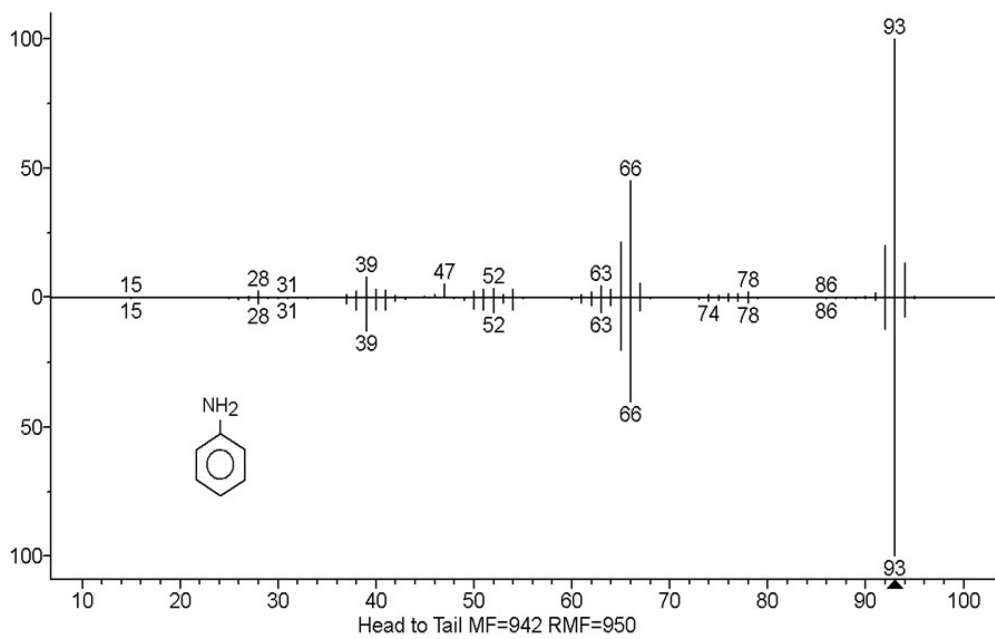

**Figure S30.** The GC-MS spectrum of aniline (bottom, simulation; top, experiment)

## References

- 1 G. M. Sheldrick, *Acta Cryst A*, 2008, **64**, 112–122.
- 2 O. V. Dolomanov, L. J. Bourhis, R. J. Gildea, J. A. K. Howard and H. Puschmann, *J Appl Crystallogr*, 2009, **42**, 339–341.
- 3 R. Wan, Z. Liu, X. Ma, H. Li, P. Ma, C. Zhang, J. Niu and J. Wang, *Chem. Commun.*, 2021, **57**, 2172–2175.
- 4 B. Yan, Y. Li, S. R. Calhoun, N. G. Cottrell, D. J. Lella and A. J. Celestian, *Inorganic Chemistry Communications.*, 2014, **43**, 23–26.
- 5 X.-X. Li, C.-H. Li, M.-J. Hou, B. Zhu, W.-C. Chen, C.-Y. Sun, Y. Yuan, W. Guan, C. Qin, K.-Z. Shao, X.-L. Wang and Z.-M. Su, *Nat Commun.*, 2023, **14**, 5025.
- 6 S. Li, H. Wang, H. Su, H. Chen, M. Du, L. Long, X. Kong and L. Zheng, *Small Methods.*, 2021, **5**, 2000777.
- 7 H.-Y. Wang, S.-R. Li, X. Wang, L.-S. Long, X.-J. Kong and L.-S. Zheng, *Sci. China Chem.*, 2021, **64**, 959–963.
- 8 M. Zhu, T. Iwano, M. Tan, D. Akutsu, S. Uchida, G. Chen and X. Fang, *Angew Chem Int Ed.*, 2022, **61**, e202200666.
- 9 K. Niinomi, S. Miyazawa, M. Hibino, N. Mizuno and S. Uchida, *Inorg. Chem.*, 2017, **56**, 15187–15193.
- 10 S.-L. Yang, G. Li, M.-Y. Guo, W.-S. Liu, R. Bu and E.-Q. Gao, *J. Am. Chem. Soc.*, 2021, **143**, 8838–8848.
- 11 J. Chen, Q. Mei, Y. Chen, C. Marsh, B. An, X. Han, I. P. Silverwood, M. Li, Y. Cheng, M. He, X. Chen, W. Li, M. Kippax-Jones, D. Crawshaw, M. D. Frogley, S. J. Day, V. García-Sakai, P. Manuel, A. J. Ramirez-Cuesta, S. Yang and M. Schröder, *J. Am. Chem. Soc.*, 2022, **144**, 11969–11974.
- 12 L. Hao, S. Jia, X. Qiao, E. Lin, Y. Yang, Y. Chen, P. Cheng and Z. Zhang, *Angew. Chem. Int. Ed.*, 2023, **62**, e202217240.
- 13 G. Jiang, W. Zou, Z. Ou, L. Zhang, W. Zhang, X. Wang, H. Song, Z. Cui, Z. Liang and L. Du, *Angew. Chem. Int. Ed.*, 2022, **61**, e202208086.
- 14 S. Chen, Y. Ju, H. Zhang, Y. Zou, S. Lin, Y. Li, S. Wang, E. Ma, W. Deng, S. Xiang, B. Chen and Z. Zhang, *Angew Chem Int Ed.*, 2023, **62**, e202308418.
- 15 W.-W. Wu, B. Li, M.-M. Wang, J.-J. Cai, S. Andra, H.-J. Lun, Y. Bai, D.-B. Dang and Y.-M. Li, *Chem. Mater.*, 2023, **35**, 6549–6556.
- 16 W. Chen, H. Li, Y. Jin, C. Wu, Z. Yuan, P. Ma, J. Wang and J. Niu, *Chem. Commun.*, 2022, **58**, 9902–9905.
- 17 W. Tang, Y. Liu, Y. Jin, Y. Wang, W. Shi, P. Ma, J. Niu and J. Wang, *Inorg. Chem.*, 2024, **63**, 6260–6267.
- 18 J. Jiao, H. Sun, C. Si, J. Xu, T. Zhang and Q. Han, *ACS Appl. Mater. Interfaces*, 2022, **14**, 16386–16393.
- 19 T. Zhang, C. Si, K. Guo, X. Liu, Q. Liu, J. Fu and Q. Han, *Inorg. Chem.*, 2022, **61**, 20657–20665.
- 20 C. Si, F. Liu, X. Yan, J. Xu, G. Niu and Q. Han, *Inorg. Chem.*, 2022, **61**, 5335–5342.
- 21 S.-K. Shi, X. Li, H. Guo, Y. Fan, H. Li, D.-B. Dang and Y. Bai, *Inorg. Chem.*, 2020, **59**, 11213–11217.
